1 **ASpediaFI: Functional interaction analysis of alternative splicing**

2 **events**

3

4 Doyeong Yu\*, Kyubin Lee\*, Daejin Hyung, Soo Young Cho, and Charny Park<sup>†</sup>

5 Bioinformatics Branch, Research Institute, National Cancer Center, 232 Ilsan-ro, Goyang-si,

6 Gyeonggi-do 10408, Republic of Korea

7

8 Doyeong Yu: nachoryu@ncc.re.kr

9 Kyubin Lee: rbqlsrqbqls56@ncc.re.kr

10 Daejin Hyung: daejin0709@ncc.re.kr

11 Soo Young Cho: sooycho@ncc.re.kr

12 Charny Park: charn78@ncc.re.kr

13

14 \* These authors contributed equally to this work as first authors.

15 <sup>†</sup>To whom correspondence should be addressed. Tel: +82-31-920-2581; Email:

16 charn78@ncc.re.kr, charn78@gmail.com

17 Present Address: Charny Park, Bioinformatics Team, Research Institute, National Cancer

18 Center, 323 Ilsanro Ilsandonggu Goyangsi, Gyeonggido 10408, Republic of Korea

19

20 **ABSTRACT**

21 Alternative splicing (AS) regulates biological process governing phenotype or disease.  
22 However, it is challenging to systemically analyze global regulation of AS events, their gene  
23 interactions, and functions. Here, we introduce a novel application, ASpediaFI for identifying  
24 AS events and co-regulated gene interactions implicated in pathways. Our method establishes  
25 an interaction network including AS events, performs random walk with restart, and finally  
26 identifies a functional subnetwork containing the AS event. We validated the capability of  
27 ASpediaFI to interpret biological relevance based on three case studies. Using simulation  
28 data, we achieved higher accuracy than with other methods and detected pathway-associated  
29 AS events.

30

31 **Keywords**

32 Alternative splicing, RNA-Seq, Gene set enrichment analysis, Random walk with restart, co-  
33 expressed gene, Splicing factor, Gene interaction, Subnetwork identification

34

## 35 **BACKGROUND**

36 Alternative splicing (AS) is a key regulatory mechanism that confers transcript diversity and  
37 phenotypic plasticity in eukaryotes [1]. In normal cells, splicing factors induce tissue-specific  
38 mRNA expression and embryonic stem cell differentiation [2,3]. In contrast, splice site  
39 mutations or splicing factor (SF) variants reprogram global splicing events and induce  
40 aberrant junctions in cancer cells and other diseased cells [4–6]. Aberrant AS events in cancer  
41 cells disrupt the function of tumor suppressor genes and activate the oncogenic pathways [6].  
42 Hundreds of RNA-binding proteins, the members of the spliceosome, play a regulatory role  
43 in the cell; however, the functional effect of the spliceosome is not fully understood. As  
44 several splicing events occur simultaneously, it is challenging to infer the effects of  
45 cooperative regulation with genes and consensus pathway enrichment.

46 To identify the differential splicing and biological relevance, the fundamental strategy is  
47 categorized as the exon- or isoform-level approaches. The exon-level approach calculates  
48 percent spliced-in (PSI) values or total read counts from exon and junction read counts. The  
49 counts indicate exon usage, which is used for testing differential AS (DAS) events. Accurate  
50 statistical models have been developed to detect DAS that rank DAS events by significance  
51 [7–10]. However, unlike various downstream methods for gene expression analysis, the AS  
52 analysis method is restricted to inferring functional regulation induced by DAS events [11].

53 Previously developed application psichomics provides various downstream analyses,  
54 including the correlation between DAS and gene expression for user convenience [11].  
55 However, they do not identify the integrative co-regulation of AS for systematically  
56 uncovering pathways. To reveal the splicing regulatory network, pCastNet identifies  
57 associations between exon and upstream regulators or downstream target genes using partial  
58 correlation. This approach requires a large number of samples (e.g. multiple tissues), and

59 supports only the method without execution file. In spite of novel method development,  
60 exon-level approaches are restricted in DAS and their results are difficult to interpret  
61 genome-wide regulation and functions by splicing.

62 To uncover functional regulation, splicing studies using isoform expression also apply  
63 differential expression test and establish co-regulation network. Differentially expressed  
64 isoforms were tested like DEG test for each isoform [12]. Because isoform abundance is  
65 estimated from whole gene region, the methods result stable expression profile and DEG [12].  
66 However these also include other limitation. Even though, major isoform differentially  
67 expressed in various conditions, isoform ratio within single gene could maintain. It is  
68 irrelevant to identify switch-like exons to regulate critical function. Nevertheless, isoform  
69 abundance is versatile to calculate expression correlations between gene pairs. To establish  
70 tissue-specific transcriptome-wide networks (TWN), previous study considered both gene  
71 and isoform expression. They identified switch-like isoforms to compute isoform ratio and  
72 established tissue-specific TWN [2,13]. TWN successfully elucidated tissue-specific  
73 molecular functions. While this method has the advantage of capturing post-transcriptional  
74 interactions, it is not adequate for tracing genomic regions of spliced exons or functional  
75 sequences like protein domains or NMD. Additionally, the isoform-level approach cannot  
76 verify cis-element usages like a donor-acceptor site, or other motifs to recognize spliceosome  
77 [6,14,15]. Therefore, a novel integrative method is required to investigate AS events and their  
78 functional interactions with partner genes as well as biological processes.

79 Recent studies have identified transcriptional regulation by the spliceosome in various  
80 conditions, including cancer, embryonic development, and other cellular phenotypes  
81 [3,5,6,16]. To reveal the global regulation by SFs, studies aimed at the identification of  
82 specific biological processes and the cooperative interactions were initiated [3,13,17].

83 Unfortunately, these approaches for identifying both splicing and associated pathways were  
84 restricted to a simple GSEA method, and independent tests for both DAS and DEG sets were  
85 performed [5,6,13]. Further, performance of multiple independent tests for splicing and gene  
86 expression does not enable the inference of global regulation by spliceosome and the  
87 interactions between AS and partner genes. Although the current gene set databases such as  
88 hallmark or REACTOME are appropriate for testing enrichment derived from gene  
89 expression [18,19], these enrichment tests using known gene sets may fail to identify novel  
90 splicing events and pertinent global interactions of the spliced genes.

91 Therefore, we developed a novel method ASpediaFI (Alternative Splicing Encyclopedia:  
92 Functional Interaction) to systematically identify functional AS events correlated with genes  
93 involved in pathways. We applied guilt-by-association generally used for gene expression  
94 analysis to splicing regulation. In order to reveal transcriptome-wide global regulation of both  
95 spliced genes and non-spliced genes, we established a heterogeneous interaction network for  
96 both genes and AS events. To increase interpretation availability, pathways including gene  
97 set information were also included to the network. Our applications explore splicing  
98 subnetwork regulated by SF conditions using discriminative random walks with restart  
99 (DRaWR). The algorithm has been applied to various heterogeneous networks like gene co-  
100 expressed interactions, sequence homology, or transcription factor-binding motif [20,21].

101 Random walk with restart (RWR) algorithm explores the interaction networks from a query  
102 gene set - called seed, and finally ranks nodes based on association with the query. To  
103 confirm whether our analysis method produces a biologically relevant result, we applied our  
104 method to three RNA-Seq datasets, which included samples from cancer patients with the SF  
105 variant and SF knockdown cells. We compared our results for three RNA-Seq dataset with  
106 previous results and other tools. The result was verified in various aspects like AS event types'

107 proportion, biological relevance, discriminative power, and other parameters. We also  
108 evaluated the performance of our method using simulated dataset. ASpediaFI is available in  
109 Bioconductor (<https://bioconductor.org/packages/ASpediaFI>).

110

## 111 **RESULTS**

### 112 **ASpediaFI algorithm and analysis workflow**

113 ASpediaFI identified a subnetwork from a heterogeneous network established using gene-  
114 gene interactions, containing gene-AS and gene-pathway interactions. The interaction  
115 network was based on the concept of guilt by association, which states that associated or  
116 interacting genes are more probable to share function [21]. We expanded the network by  
117 adding AS events and pathways to the feature nodes. Quantitative information weighting  
118 network edges were collected from PSI, gene expression and pathway gene sets. The  
119 ASpediaFI workflow starts with data preparation and sequentially follows through  
120 heterogeneous network establishment, subnetwork exploration, and further downstream  
121 analysis. During the data preparation step, our method identifies AS events from gene model  
122 annotation, collects gene expression, calculates PSI profile, and refers pathway gene sets and  
123 gene interaction data collected from public databases (Figure 1A). ASpediaFI integrates the  
124 processed data to construct a heterogeneous network that contains gene nodes and its feature  
125 nodes representing AS event and pathway. Before executing the algorithm, the adjacency  
126 network is normalized within the feature nodes and for all nodes. Next, to explore the  
127 subnetworks, our method performs DRaWR on the heterogeneous network using previously  
128 defined relevant query gene sets collected from DEGs (Figure 1B, blue node) [21]. In the first  
129 stage, our algorithm explores the highly ranked feature nodes from the query set. We then

130 extract a subnetwork from these feature nodes chosen from the first stage and all gene nodes,  
131 including associated edges (Figure 1B). Next, ASpediaFI performs second stage RWR for  
132 gene nodes to rank again and additionally calculates *P*-values by permutation tests to  
133 eliminate background effects like query gene size. For user convenience, our tool provides  
134 further analyses, including GSEA and data visualization. More details of our algorithm are  
135 described in the Method section.

### 136 **Alternative splicing analysis using three RNA-Seq datasets applying ASpediaFI**

137 To verify the capability of ASpediaFI, we analyzed three RNA-Seq datasets representing the  
138 following: myelodysplastic syndrome (MDS), stomach cancer (STAD), and RBFOX1-  
139 knockdown cell lines. MDS and STAD were collected from cancer patients, and RBFOX1  
140 has replicated samples of a relatively smaller size ( $n = 5$  per condition). The datasets contain  
141 SF mutations or down-regulations. We compared the SF deficiency profiles with the wild-  
142 type using ASpediaFI and investigated whether our DAS sets determine the splicing pattern  
143 and cis-element usage by the spliceosome. The biological relevance of our highly ranked  
144 pathway result was delineated by referring to previous studies, and the consistency of GSEA  
145 in using gene expression was also evaluated. Additionally, we tested how much our DAS set  
146 was enriched in known and novel pathways or how much our result was coherent based on  
147 other known AS signatures compared to other methods. In a further overall investigation of  
148 the DAS set, we thoroughly examined the DAS events belonging to known and novel  
149 pathways compared to other results. Each spliced gene was reviewed for biological relevance  
150 and functional consistency with identified pathways. Additionally, functional sequence  
151 features like protein domain and NMD that exist on spliced exons were extensively  
152 investigated and compared with other results [22].

153 **Case study 1: Three splicing factor mutations in myelodysplastic syndrome induce the**  
154 **dysregulation of heme metabolism.**

155 We investigated AS events in RNA-Seq samples from MDS patients (n = 84) with SF  
156 deficiency on SF3B1 (n = 28), SRSF2 (n = 8), and U2AF1 (n = 6) using three respective  
157 query gene sets of 112, 107, and 96 differentially expressed genes [13]. By comparing SF  
158 mutations (MUT) with wild-type (WT) samples, we identified 281, 269, and 285 AS events  
159 and 19, 31, and 15 pathways, respectively, for SF3B1, SRSF2, and U2AF1 (Additional File 1:  
160 Table S1). Proportions of each AS event type are summarized in Figure 2.A. RI (37.9–53.7%)  
161 was most frequently detected in three cases, and the frequency of A3 events was next  
162 (Additional File 2: Table S2). The dominant occurrence of RI and A3 events in our result is  
163 consistent with a previous MDS analysis study using rMATS [4,6,13,23–26]. However, in  
164 the previous study, a more refined final DAS set from two comparisons using both WT and  
165 healthy control samples as controls, were selected [7,23]. When considering a single  
166 comparison with WT samples in rMATS as we did, SE showed the largest proportion across  
167 the three SF analyses (34.1 ~ 59.4%; Additional File 2: Table S2). When comparing with  
168 results from the other two methods (performed in the final section of evaluation), SUPPA2  
169 detected A3 (40.3 %) most frequently, followed by SE (28.7 %) and RI (19.4 %) [8]. MISO  
170 showed a similar pattern to that of rMATS (SE 25.5 %, A3 18.4 %, and RI 25.7 %) [9]. Three  
171 SFs, SF3B1, SRSF2, and U2AF1, are known to recognize the 3' splice sites (acceptor sites)  
172 [15]. Therefore, our method minimized bias toward specific AS event types and reflected the  
173 role of spliceosome recognizing cis-elements. SUPPA2 was also able to project the  
174 characteristics of the spliceosome.



175 To delineate pathway regulation for each SF MUT, we presented hallmark pathways highly  
176 ranked by stat-P (Figure 2B; further details of stat-P described in the Method section). The  
177 heme metabolism (HM) pathway was top-ranked in all three analyses. Coagulation, hypoxia,  
178 oxidative phosphorylation, inflammatory response, and estrogen receptor signal pathways  
179 were also revealed to be regulated by the three SF MUTs. The previous MDS study used a  
180 commercial software, IPA for pathway analysis, which ranked sirtuin signaling as the first  
181 and heme biosynthesis as the second [13]. As the sirtuin pathway was absent in the hallmark  
182 pathway set, our result is remarkably similar to that of the previous study.

183 For additional validation, we evaluated the discriminative power of our AS event set and  
184 compared the enrichment to biological function with the rMATS result. Specifically, we  
185 investigated the result of the SF3B1 analysis. As shown in a scatterplot of principal  
186 component analysis (PCA), the PSI profile of 281 AS events accurately discriminated  
187 between the MUT and WT samples (sensitivity: 100%, specificity: 96.3%; Figure 2C). To  
188 compare and to evaluate pathway enrichment of our AS event set, we executed rMATS and  
189 obtained DAS sets for two conditions, one with the same criteria adopted in the previous  
190 MDS study (Cond1;  $n=596$ ) and another with a more strict option (Cond2;  $n=367$ ) [13].  
191 Previous literature in combination with our findings (Figure 2B) suggests that hematopoietic  
192 malignancy, HM, and heme biosynthesis are dysregulated by SF3B1 mutation in MDS or  
193 U2AF1 in other blood cancers [4,6,13,23–26]. Therefore we selected the HM pathway as a  
194 true gene set. ASpediaFI demonstrated the best overall performance from the perspective of  
195 both Fisher's exact test  $P$ -value and Jaccard index in all three SF MUT analyses except  
196 SRSF2, where rMATS Cond1 showed the lowest  $P$ -value (Figure 2D). We additionally  
197 examined our AS event genes and their specific functions using the Venn diagram to compare  
198 the three sets from ASpediaFI, rMATS Cond2, and HM expansion set (Figure 2E). We chose

199 rMATS Cond2, which performed better in the SF3B1 analysis over Cond1. We generated the  
200 HM expansion set by merging the HM pathway gene set with interacting genes in our PPI  
201 network in order to investigate novel candidates for genes regulating the pathway by  
202 alternative splicing (more details are described in method). AS event genes of ASpediaFI  
203 (Fisher's exact test  $P$ -value = 0.004) are more significantly enriched in the HM expansion set  
204 than in rMATS Cond2 ( $P$ -value = 0.199). Meanwhile, we explored several functional  
205 sequence features involved in splicing regions using the ASpedia database. The AS events  
206 generated by our analysis were involved in more protein domains, nonsense mediated-decays  
207 (NMD), and isoform-specific protein-protein interactions (PPI) than those generated by  
208 rMATS Cond1 and Cond2 but contained fewer post-translational modifications (PTM) and  
209 repeat regions (Additional File 2: Table S4; Figure 2F) [22].

210 We examined the biological function of spliced genes in two distinct mutually exclusive sets  
211 of ASpediaFI ( $n = 22$ ) and rMATS ( $n = 8$ ) overlapping with the HM expansion set  
212 (Additional File 2: Table S3). We divided the HM expansion set into two, known genes that  
213 belong to the HM pathway and novel genes adjacent to the genes in the HM set. Total events  
214 in the exclusive sets were detected at a higher frequency with ASpediaFI. Novel AS genes  
215 were also detected more efficiently with ASpediaFI ( $n=17$ ; rMATS  $n=8$ ). We identified two  
216 known splicing genes NARF and SNCA, that are directly associated with MDS belonging to  
217 the HM pathway (Additional File 2: Table S3). Interestingly, only ASpediaFI detected an AS  
218 event on the synuclein alpha (*SNCA*) gene, and the ASpedia database identified the  
219 'synuclein' domain in the AS inclusion region (Additional File 2: Table S3), which has been  
220 shown to interact with sirtuin 2 [27]. As we already described in previous, sirtuin signaling  
221 was not able to detect in our result (Figure 2B). However we successfully identified SE event  
222 of the sirtuin signal-associated gene, *SNCA* and our result implies to engage spliced genes in

223 both heme metabolism and sirtuin-1 autophagy pathway like previous finding [28]. We also  
224 exclusively identified a RI event of NARF in the C-terminal' domain of the 'Iron only  
225 hydrogenase large subunit' where the event induces Alu-exon insertion and affects substrate-  
226 binding affinity or catalytic activity in MDS [25]. The ASpediaFI results also included more  
227 novel AS events (HM expansion set) (47% of 17) involved in protein domains compared to  
228 rMATS (40% of 5; Additional File 2: Table S3). Among the novel events identified by  
229 ASpediaFI, we found a RI event of CDC37. The gene is regulated by Hsp90 during the  
230 biogenesis of the active conformation of the heme-regulated eIF2 $\alpha$  kinase, and spliced site is  
231 critical to the loss of the 'Hsp90 binding' domain [29]. In summary, ASpediaFI identified  
232 more number of novel AS events than rMATS. These findings can be interpreted as evidence  
233 that ASpediaFI efficiently detects novel and functionally important AS events.

234 **Case study 2: EMT pathway in stomach cancer induced by ESRP1 and the**  
235 **representative AS events.**

236 Epithelial regulatory splicing factor, ESRP1, is down-regulated during epithelial-  
237 mesenchymal transition (EMT) and plays a critical role in tumor progression [30,31]. We  
238 performed analysis on the TCGA STAD RNA-Seq dataset to examine ESRP1-related AS  
239 events, associated pathway regulation. Additionally, we investigated the consistency of our  
240 results by comparing it with GSEA using gene expression to verify our method by  
241 performing integrative analysis. Samples were classified into ESRP1 high (n = 41) and low (n  
242 = 42) groups based on ESRP1 mRNA expression (RPKM). ASpediaFI identified seven  
243 pathways and 293 AS events (Additional File 1:Table S1). The PSI profile of the detected AS  
244 events provided a powerful discriminatory performance (Sensitivity: 100%, Specificity: 69%;  
245 Figure 3A). The proportions of five AS event types are presented in Figure 3B. SE was

246 identified in 66%, and it was three times the sum of (22%) of A3 and A5. In additional DAS  
247 analysis using SUPPA2, SE events (57%) were detected most frequently. Percentages of five  
248 AS types identified by ASpediaFI consistently resembled those detected by SUPPA2, as  
249 already uncovered in case study 1. In pathway analysis, ASpediaFI ranked the EMT pathway  
250 on top and consequently identified EMT-associated pathways such as ‘myogenesis’ and  
251 ‘apical junction’ (Figure 3C). To compare gene expression-based analysis with ours, we  
252 estimated pathway scores for each sample using GSVA from the gene expression profile and  
253 compared them with our pathway rankings (Figure 3C) [32]. The GSVA result resembled our  
254 rankings except for two pathways, ‘IL2-STAT5 signaling’ and ‘UV response down,’ which  
255 exhibited lower relevance than EMT and myogenesis.

256 To investigate the biological function and novelty of spliced genes, we compared two AS  
257 gene sets inferred from ASpediaFI and SUPPA2 with the EMT expansion set (Figure 3D).  
258 The two gene sets were equivalently enriched in the expansion set (Fisher’s exact test  $P$ -value  
259  $< 0.003$ ). When retrieving functional sequences of DAS events from ASpediaFI and SUPPA2  
260 (Additional File 2: Table S4), AS events were comparably enriched in protein domains for  
261 ASpediaFI (32.5%) and SUPPA2 (33.1%). The frequency of NMD was slightly higher in  
262 ASpediaFI, and SUPPA2 was better at identifying repeat regions. PTM and PPI were  
263 remarkably much more frequently identified by ASpediaFI (37.0%, 35.8%) than SUPPA2  
264 (29.9%, 24.0%). Meanwhile, ASpediaFI exclusively identified more novel AS events ( $n = 23$ )  
265 than SUPPA2 ( $n = 16$ ). Moreover, the novel events identified by ASpediaFI were more  
266 involved in protein domains (ASpediaFI: 34.8 % of 23 events, SUPPA2: 25% of 16;  
267 Additional File 2: Table S5). On comparing the DAS sets from ASpediaFI and SUPPA2 with  
268 five known EMT or ESRP1-associated splicing signatures [31,33–35], the results of the

269 Fisher's test and Jaccard indices were notably better for the ASpediaFI DAS set across all  
270 signatures (Figure 3E).

271 Notably, our result identified novel events, ENAH SE, FGFR2 MXE, and TCF7L2 SE, which  
272 were neither present in the hallmark EMT pathway gene set nor detected by SUPPA2. The  
273 three events were also identified in all five splicing signatures (Figure 3E). PSI values of  
274 these splicing events exhibit strong correlation coefficients ( $|r| = 0.62 \sim 0.72$ ) with EMT  
275 pathway scores calculated by GSVA based on gene expression (Figure 3F). Our three events  
276 were also present in the EMT-associated submodule extracted by applying stringent cutoffs  
277 (gene log<sub>2</sub> fold change > 2 and AS | dPSI | > 0.25) (Figure 3G). Our network revealed the  
278 functional interactions of TCF7L2 and FGFR2 with FLNA to be a network hub and to  
279 regulate EMT in tumor cells [36]. Occurrence of the representative three AS events in the  
280 genomic regions lead to changes in the protein domain, and these were shown to be strongly  
281 involved in EMT-associated functions based on previous literature [16,37,38]. ENAH, an  
282 actin cytoskeleton regulatory gene, is spliced, and exon11a is skipped on the EVH2 domain  
283 (Additional File 3: Figure S1). FGFR2 MXE generates two isoforms: FGFR2-IIIb, which is  
284 exclusive to epithelial cells and FGFR2-IIIc, which causes a switch from the mesenchymal  
285 isoform and induces a change in ligand binding specificity, thereby regulating cell  
286 proliferation and differentiation (Additional File 3: Figure S1) [16]. TCF7L2 SE is present in  
287 the 'N-terminal CTNNB1 binding' region, FGFR MXE in the 'Immunoglobulin I-set domain,'  
288 and ENAH in the 'EVH2 domain' (Additional File 3: Figure S1). TCF7L2 SE in the  
289 CTNNB1 binding domain has an impact on the activity of Wnt/ $\beta$ -catenin target genes, and its  
290 deficiency was verified as the depletion of a proliferative cell compartment in the intestinal  
291 epithelium in mouse [38]. Its switch-like exon usage was revealed to be associated with  
292 invasive and mesenchymal-like breast tumors [37].

293 **Case 3: Splicing events uncover neuronal development by RBFOX1 knockdown.**

294 AS events mediated by RNA-binding protein RBFOX1 regulate neuronal development and  
295 pertain to brain diseases like autism [5,14]. We analyzed the RBFOX1 knockdown RNA-Seq  
296 dataset of primary human neural progenitor cells, which included five RBFOX1 knockdown  
297 samples and five control samples. In order to be consistent with the previous study, we  
298 changed the reference pathway gene set to GO level 5 [5]. Finally, ASpediaFI identified 291  
299 AS events and nine pathways (Additional File 1: Table S1). A3, RI, and SE were frequently  
300 detected, and MXE was the least predominant (Figure 4A). To verify the result, our AS genes  
301 were compared with three relevant gene signatures (autism, RBFOX1, and RBFOX2) and  
302 three controls (mitochondrial, ataxia, and epilepsy) obtained from the previous study using  
303 the Jaccard index (Figure 4B) [5]. Relevant signatures were collected from spliced gene  
304 analysis results of autism (n = 247), RBFOX1 (n = 1103), and RBFOX2 (n= 1681). Controls  
305 were randomly selected from known gene sets, mitochondrial (n=310), ataxia (n=51), and  
306 epilepsy (n=46). Relevant signatures exhibited higher similarity to our AS gene set in terms  
307 of the Jaccard index compared to that of the control set (Figure 4B). In accordance to the  
308 pathway ranking of our analysis, neurogenesis, neuron differentiation, and nervous system  
309 development pathways were induced in response to RBFOX1 knockdown (Additional File 1:  
310 Table S1).

311 To evaluate the pathway detection performance, we compared our results with those of the  
312 previous study [5]. The study generated two sets of SE events with differential exon inclusion  
313 and exclusion. The biological process was also investigated by GSEA for each AS set. In  
314 further GSEA using the AS event set, the previous study identified a subnetwork regulated at  
315 the gene expression level. We combined the two AS sets into one ‘DAS’ set and used a co-

316 expressed subnetwork gene set named ‘Blue module’ from the previous study [5]. To verify  
317 the gene set enrichment in biological process detection potential, these two gene sets were  
318 compared with the highly scored genes (permutation  $P$ -value  $< 0.05$ ) identified by our  
319 method. We chose the top five GO terms from the GSEA result of the three gene sets and  
320 computed their percentile ranks (Figure 4C). The ‘Blue module’ was enriched in cell  
321 migration and motility but failed to detect neuronal differentiation and neurogenesis. In  
322 contrast, we observed that nervous system development was more enriched than cell  
323 migration and motility in the ‘DAS’ gene set (Figure 4C). Unlike these two signatures,  
324 ASpediaFI successfully identified the most relevant biological processes associated with  
325 neuronal development on top percentile rank GO terms except for post-transcriptional  
326 regulation, viral life cycle, and mitotic cell cycle (Figure 4C, the first column FI). This result  
327 illustrates the advantage of our integrative approach based on both gene expression and PSI  
328 profiles and the limitation of independent gene set tests (Blue module and DAS) for  
329 analyzing splicing-associated biological functions.

330 We identified an RBFOX1-associated module within the heterogeneous network (Figure 4D).  
331 The subnetwork included AS events of ROBO1 and CLIP1, both of which had neural-  
332 regulated micro-exons (exons with  $3 \leq 27$  nt) involved in an AS interaction network  
333 associated with the autism spectrum disorder in the previous study [14]. Among our AS  
334 events, three micro-exon events (AP2M1, CLASP1, ROBO1) were detected as neural-  
335 regulated in the previous study. In particular, ROBO1 exon 18 skipping is known to induce  
336 helical domain exclusion and is involved in the loss-of-function of the ROBO1-SLIT2  
337 signaling, thereby modulating neurogenesis and proliferation (Figure 4E). In our result, exon  
338 exclusion of ROBO1 was significant (permutation  $P$ -value = 0.001, dPSI = -0.265;  
339 Additional File 1: Table 1) and moderately correlated with the GSVA scores of the

340 REACTOME ROBO receptor signaling pathway ( $r = -0.53$ ). Meanwhile, exonic regions in  
341 our AS sets were involved in the protein domain (45.7 %) and isoform-specific interactions  
342 (21.3 %) (Additional File 2: Table S4). SE events by RBFOX1 knockdown induce an  
343 increase in the alteration of the protein domain, NMD, and repeat region, but decrease PTM  
344 and PPI.

### 345 **Performance comparison using SF3B1-associated MDS RNA-Seq dataset**

346 The ability of the four different methods to detect DAS was evaluated by using the case study  
347 1 database (details described in Methods). We selected an additional three programs, rMATS,  
348 MISO, and SUPPA2 for comparison [7–9]. We obtained four DAS sets from ASpediaFI (281  
349 events at 194 genes), rMATS (596 events at 415 genes), MISO (685 events at 461 genes),  
350 and SUPPA2 (129 events and 99 genes) that were extracted from the results. To evaluate the  
351 functional enrichment of the detected DAS genes, we assessed the enrichment in the HM and  
352 expansion gene set, which are clinically known pathways regulated in MDS SF3B1 MUT  
353 samples [4,13,23–26]. The ASpediaFI result showed the best performance based on metrics  
354 like Fisher's exact test  $P$ -value and  $F_1$  score (Figure 5A, Additional File 3: Figure S2).  
355 Between the two gene sets (Figure 5A), the ASpediaFI recall (0.175) in the HM expansion set  
356 was much better than that in HM (0.04). This result suggests that our method provides better  
357 performance for identifying AS events in a novel gene set like HM expansion compared to  
358 the other three tools (Figure 5A, Additional File 3: Figure S2). Meanwhile, to reduce the bias  
359 of comparing DAS sets with a different number of events, we modified the criteria for  
360 differential splicing such that the top 300 ranked AS events after filtering out events with  
361  $dPSI < 0.1$  are selected. This strategy substantially decreased the total counts in MISO and  
362 rMATS. ASpediaFI exhibited the best performance across Fisher's exact test, precision,



363 recall, and  $F_1$  than others (Additional File 2: Table S6). Regardless of the numbers of DAS  
364 events based on relaxed or strict thresholds, ASpediaFI consistently outperformed the other  
365 methods in detecting biologically relevant DAS events enriched in HM and expansion set.

366

### 367 **Performance evaluation on simulated datasets**

368 To evaluate the ability of ASpediaFI to detect biologically relevant DAS events under a  
369 simulated environment, we generated a simulation dataset imitating the genomic  
370 characteristics of the MDS MUT and WT datasets. To artificially induce DAS events, we  
371 used the intersection DAS set identified by MISO (892 genes), rMATS (640 genes), and  
372 SUPPA2 (623 genes) as the ground truth for the evaluation (Figure 5B). Transcript counts of  
373 20 replicates per condition were simulated from the distributions estimated by SF3B1 MUT  
374 and WT samples. We assigned the pre-determined relative isoform abundances for 125  
375 ground truth AS genes collected from the intersection of three results, while those of other  
376 genes were drawn from the uniform distribution. ASpediaFI was excluded from generating  
377 these simulated RNA-Seq data for the blind test.

378 The ability of the four methods to detect previously defined ground truth AS events was  
379 verified. To measure the discriminative power, we computed AUC, AUC-ROC, and AUC-PR.  
380 As ASpediaFI runs DRaWR generating stationary probabilities for two stages, we used both  
381 stat-P's for the comparison. The first stage (S1) stat-P values were computed for the whole  
382 AS events, and the final stat-P values (S2) were considered as refined ranks, enhancing the  
383 internal performance. ASpediaFI S1 achieved a higher AUC-ROC value of 0.79 than MISO  
384 (0.64), rMATS (0.67), and SUPPA2 (0.67) (Figure 5C). The performance difference  
385 manifested the overall false-positive rate ( $0 \leq 0.75$ ). Not surprisingly, ASpediaFI S2 was

386 better (AUC-ROC = 0.94) than S1. Moreover, we assessed the accuracy based on the lower  
387 number of samples per condition between the four methods. Compared to the fully simulated  
388 dataset (20 replicates per condition), the three other methods showed consistent performance  
389 for the smaller sample sizes (10 replicates) (Additional File 3: Figure S3). In the smallest  
390 dataset (n=5), our AUC-ROC decreased to 0.73 from 0.78, but the difference of true-positive  
391 rate was still maintained over the most important region (false-positive rate 0 ~ 0.25).  
392 Although the AUC values of ASpediaFI slightly decreased, followed by sample size, S1  
393 consistently exhibited superior performance compared to the other methods across the three  
394 simulated datasets of different sizes (Figure 5D, Additional File 3: S3). Additionally, the  
395 discriminative power of S2 remained reasonably stable under varying sample sizes.

396 We further examined the biological relevance of DAS events detected from the fully  
397 simulated dataset. As the simulation RNA-Seq samples were derived from SF3B1 MUT and  
398 WT samples, and as the ground truth AS events were defined based on the MDS sample  
399 analysis, we expected that the simulated samples would maintain the characteristics  
400 associated with the HM pathway dysregulation. Before DAS identification, we validated our  
401 assumption using GSEA with the gene expression profile. Finally, the HM pathway was  
402 consistently observed as the most significantly enriched pathway in the simulated dataset, as  
403 in case study 1 (adjusted  $P$ -value = 0.06; Figure 5E). The previously identified hypoxia and  
404 MTORC1 signaling pathways were also retained (adjusted  $P$ -value = 0.15, 0.17). Next, to  
405 make a fair comparison with ASpediaFI (DAS events  $n = 499$ ), we identified the top 500  
406 DAS after filtering  $|dPSI| > 0.1$  using the other three methods. ASpediaFI exhibited a higher  
407 degree of enrichment in both the HM and expansion sets compared to the other three methods  
408 based on Fisher's exact test  $P$ -value and  $F_1$  score (Figure 5F, Additional File 3: Figure S4).  
409 When stricter statistical cutoffs (FDR < 5% for rMATS and SUPPA2, Bayes Factor  $\geq 5$  for

410 MISO) were applied to the other three methods, 210–280 AS events were identified  
411 (Additional File 2: Table S7). rMATS showed the highest enrichment according to Fisher’s  
412 exact test (HM  $P$ -value = 0.015, expansion  $P$ -value = 0.00085). Nevertheless, we observed  
413 that ASpediaFI showed better performance with respect to the  $F_I$  score (ASpediaFI 0.2,  
414 rMATS 0.107) of HM expansion than rMATS. It implies that our method detected novel AS  
415 events that are not present in the curated gene set. Overall, based on our benchmarking  
416 analyses using computationally simulated datasets, ASpediaFI showed a higher potential for  
417 identifying biologically-relevant DAS events.

418

## 419 **DISCUSSION**

420 After the advent of next-generation sequencing, various novel methods for DAS analysis  
421 have been developed. Although approaches for DAS event identification have improved in  
422 accuracy, it is still a challenge to interpret the biological relevance as well as integration with  
423 regulatory mechanisms with DAS events. Here, we suggest an integrative method, ASpediaFI,  
424 to systematically identify AS events, co-expressed genes, and pathways regulated by the  
425 transcriptome. ASpediaFI ranks AS events, pathways, and genes, and also intuitively  
426 provides functional interactions in the form of an interaction network. It enables the users to  
427 understand global regulation and specific pathways by spliceosome and to choose more  
428 relevant AS events as markers.

429 In order to verify the intrinsic ability of ASpediaFI, we analyzed three case study datasets of  
430 MDS, STAD, and RBFOX1 knockdown. Pathway analysis results using our method  
431 presented remarkable consistency with GSEA or GSVA using the gene expression profile.  
432 This consistency can be attributed to the fact that our analysis starts with getting a query from

433 the DEG set and performs RWR via a heterogeneous network that includes correlated AS  
434 with gene expression. Despite tumor heterogeneity in case 1, the high number of replication  
435 (total samples  $n = 84$ ) facilitated the identification of AS events, their interacting genes, and  
436 pathway-level regulation by SF MUT. Next, we succeeded in identifying the gastric cancer  
437 EMT subtype based on the DAS. The subtype was revealed to be the one with the poorest  
438 survival among the four known gastric cancer subtypes [39]. Even though we identified a  
439 small size DAS set of around 200 events, our result demonstrated the discriminative power to  
440 classify samples by SF regulation (Figure 2C, Figure 3A). In particular, the three  
441 representative AS events, ENAH, FGFR2, and TCF7L2, that were identified only by  
442 ASpediaFI, had the potential to effectively classify the gastric cancer EMT subtype. It was  
443 comparable to the previous classification of the EMT subtype using the gene signature of  
444 over 300 genes [39]. In case 3, the previous RBFOX1 study performed GSEA and network-  
445 based module identification for each DEG and DAS sets [5]. This previous approach required  
446 the identification of relatively large DAS sets ( $n = 996$ ). To uncover relevant biological  
447 process, the large size DAS set was divided into subsets by SE type or exon inclusion, and  
448 multiple sets were respectively used for GSEA. Moreover, independent analyses of DEG and  
449 DAS could not be interlinked to explain the systematic interactions between AS events,  
450 although the previous study successfully revealed the regulation of neuronal development by  
451 RBFOX1. Moreover, the pathway revealed using the two gene sets used in the previous study  
452 was complementary for uncovering neuronal development by RBFOX1, as already shown  
453 (Figure 4C). The multiple independent tests and complementary result highlight the  
454 advantage of our method.

455 In the case studies, our method correctly identified the AS type usage based on the role of SF  
456 with respect to recognizing donor and acceptor sites. In the previous study comparing several

457 DAS methods, exon-based approaches mostly showed the best AU-ROC in terms of the SE  
458 event among the four AS types compared to the isoform-based methods [12]. Moreover, SE  
459 is the predominant type in the human gene model, and its PSI value calculated from three  
460 junctions and exons is more stable than A3 and A5 calculated from transcript regions  
461 narrower than SE. Therefore, exon-based DAS analysis applications have the potential to  
462 include bias according to AS type than isoform-based methods [12]. U2AF1, like SF3B1, is a  
463 member of the U2 complex and is known to recognize the 3' dinucleotide motif AG, so A3  
464 and RI could increase in the background of U2 complex member deficiency [6]. In case study  
465 1, our result mirrors the characteristics of spliceosomes. Among the four tools we used, the  
466 AS type proportions of SUPPA2 resembled ours in case studies 1 and 2. The results of case  
467 study 2 and 3 were similar to previous results that identified the induction of SE events by  
468 ESRP1 and RBFOX1 [5,30,31]. In contrast to our result, rMATS most frequently detected SE  
469 events in the case studies. We deduced that the previous study on the MDS dataset had to  
470 carry out two comparisons with two different controls to avoid the SE bias [13]. When  
471 calculating the ratios of SE over the sum of A3 and A5 from several EMT-associated DAS  
472 results, rMATS (SE n=239, FDR < 10%; 18.8 times) and MADS+ (20 times) detected SE  
473 events at a higher frequency than previous analyses using Affymetrix exon 1.10 microarray  
474 (8.8 times) and RNA-Seq dataset considering sequence motif (3.6 times) and ours (3.1 times)  
475 [7,30,31,34]. That is, ASpediaFI provided results with a minimal bias toward SE, similar to  
476 SUPPA2.

477 To evaluate the performance of ASpediaFI and to compare it with other tools, we selected  
478 three analysis tools. In the early stage, we tried to add JUM, but we decided not to use it due  
479 to the extremely lower number of DAS passing the FDR threshold (< 5%). JUM can identify  
480 novel structured AS events not present in the transcriptome annotation [10]. We speculated

481 that the advantage of JUM with respect to identifying novel events paradoxically reduced the  
482 detection of proper DAS events. Meanwhile, we chose the HM pathway as a gold standard  
483 for the performance evaluation of the analysis of the MDS dataset, based on the evidence  
484 from case study 1 and multiple previous clinical MDS studies [4,13,23–26]. The previous  
485 studies consistently reported the deficiency in heme biosynthesis and iron homeostasis due to  
486 splicing upon analyzing 12 × 100 samples. Unfortunately, the previous four splicing  
487 signatures identified from SF3B1 MUT samples did not have uniform quality, and identified  
488 AS signatures were small size ( $n = 20 \times 202$ ) except for one ( $n = 1403$ ) [4,13,24,40]. However,  
489 we tried to perform Fisher’s exact test and Jaccard index for these four splicing signatures  
490 with our ASpediaFI AS results, Iron homeostasis transport, inflammatory response, HM and  
491 expansion set to evaluate the functional relevance based on previous studies [4,6,13,23–26].  
492 ASpediaFI showed remarkable consistency (Fisher  $P$ -value  $< 0.0003$ ) with three signatures  
493 except for the smallest sized signature ( $n = 20$ ;  $P$ -value = 1). Next, the HM and expansion set  
494 represented the best enrichment (HM Fisher median  $P$ -value = 0.1; expansion  $P$ -value = 0.1)  
495 than others (Iron homeostasis transport  $P$ -value = 0.3; Inflammatory response  $P$ -value = 0.8).  
496 Based on these results and previous studies, we concluded that DAS events induced by  
497 SF3B1 MUT in MDS are enriched in the HM pathway and continued our evaluations.

498 During the evaluation using a simulated dataset, our method consistently showed the best  
499 performance compared to the other three tools. We tried to generate simulated RNA-Seq  
500 samples imitating actual MDS characteristics. We evaluated our capability to detect  
501 biologically relevant AS events in a dedicated setup, including the estimation of MUT and  
502 WT transcript count distributions and recurrent detection of DAS. Finally, we worked on  
503 benchmark evaluation as well as investigation of HM pathway enrichment. ASpediaFI  
504 generated the best ROC curves and presented a true-positive rate difference continuously

505 across a long-range of false-positive rates ( $< 0.75$ ) (Figure 5C). In the datasets with smaller  
506 sample sizes ( $n = 10$  and  $5$ ), our method still showed the best result. For the evaluation of our  
507 tool, we used both S1 and S2 scores (Figure 5C). However, the second stage RWR is  
508 performed to rescore only AS events selected in S1. Therefore, S1, which is run on total AS  
509 events, is more suitable for comparison, and the outstanding achievement of S2 should be  
510 carefully interpreted. To achieve the best performance for each tool, we optimized parameters,  
511 such as FDR, dPSI, or BF and generally used cutoff values of other studies [7,10,24].  
512 Sometimes, we removed additional filtering (dPSI) and only considered numerical scores  
513 (FDR or BF) from each tool. Despite these attempts, MISO demonstrated a weak  
514 performance in AUC-PR and HM enrichment. While rMATS showed the best performance in  
515 HM enrichment, ASpediaFI presented the best overall performance.

516 Our novel integrative approach using both PSI and gene expression offers a unique advantage.  
517 Instead of independent multiple GSEA tests for DAS and DEG, ASpediaFI systemically  
518 elucidates interactions between AS and genes and delineates pathway regulation. Another  
519 novel characteristic is its ability to identify relevant pathways using small size DAS sets. In  
520 contrast, other studies analyzed approximately 500–1000 AS events to reveal biological  
521 functions, and investigated pathways by dividing sets into inclusion and exclusion events.  
522 However, our method required fewer than 300 AS events to identify specific pathways in the  
523 three case studies. The total counts of our AS results are close to the recommended gene set  
524 size of at least 15 to at the most 200 genes [18] essential to identify splicing markers. Besides,  
525 there are additional advantages. AS event IDs of ASpediaFI results could be used to query the  
526 ASpedia database to explore comprehensive functional sequence features like protein domain,  
527 NMD, and isoform-specific interaction. Our tool has no dependency on any organisms or  
528 alignment tool. ASpediaFI refers dataset or file formats—BAM file, gene model, PPI, or gene

529 sets—widely used in gene expression analyses. Moreover, our method supports fast  
530 execution time. The most time-consuming jobs to read bam files are provided with multi-  
531 thread option, and the principal analysis of DRaWR S1 and S2 except preprocessing is  
532 executable in a PC environment (RAM 16GB, CPU 3.40GHz and 2 minutes of execution  
533 time for case 1 SF3B1 dataset with total 82 RNA-Seq samples).

534 There are several limitations to ASpediaFI. Our method requires a reference interaction  
535 network and gene set. Prior to network establishment, our method involves filtering based on  
536 several criteria, including low gene expression and standard deviation of PSI. While it is  
537 effective at excluding unreliable PSI values calculated from lowly expressed genes, it is  
538 subject to the loss of lowly expressed true-positive AS events. As shown in the performance  
539 evaluation, our application needs at least five samples per condition to obtain a stable result.  
540 Additionally, ASpediaFI requires at least three samples per condition to calculate the  
541 correlation coefficient between the AS and gene. In a further development, we expect to  
542 improve the applicability of our method to a small dataset with less than five replicates or  
543 even without replication. Moreover, we also hope to extend our algorithm to the analysis of  
544 novel conditions like time-series or continuous statement of SF.

545

## 546 **CONCLUSION**

547 In this study, we developed ASpediaFI and analyzed RNA-Seq datasets to verify the  
548 capability of our method to interpret biological processes regulated by splicing. As shown in  
549 the three case studies, ASpediaFI successfully identified AS events and relevant pathways  
550 involved in query DEGs. On comparison with three other three programs, ASpediaFI showed



551 superior performance, as determined by the AUC-ROC and AUC-PR. We expect that  
552 ASpediaFI will uncover novel roles and global regulation of SFs.

553

## 554 **MATERIAL AND METHODS**

### 555 **Data preparation**

556 ASpediaFI requires input files, including a gene model, RNA-Seq BAM files, gene  
557 expression profiles, pathway gene sets, and a global gene-gene interaction network. First, AS  
558 events were identified using a gene model of a GTF file and classified into the following five  
559 types: alternative 5' splice site (A5), alternative 3' splice site (A3), skipping exon (SE),  
560 mutually exclusive exons (MXE), and retained intron (RI). PSI values of the identified events  
561 were calculated based on read counts mapped to exons and splice junctions. ASpediaFI uses  
562 these AS events, pathway gene sets, and a gene interaction network as reliable sources of  
563 interactions for the construction of a heterogeneous network. Our heterogeneous gene  
564 interaction network refers to a reference gene interaction. In our analysis, we collected and  
565 curated reference-based interaction databases (BIND, DIP, HPRD, and REACTOME) to  
566 build a reference human gene interaction compendium, which contains 10,647 genes and  
567 54,037 interactions [19,41–43]. We also referred to public pathway databases (hallmark,  
568 REACTOME, and KEGG) and obtained a total of 910 human pathway gene sets [18,19,44].

### 569 **Heterogeneous network construction**

570 Based on the biological information inferred from the RNA-Seq datasets and public databases,  
571 ASpediaFI constructed a heterogeneous network composed of gene nodes and two types of  
572 feature nodes: AS event and pathway. The heterogeneous network allows interactions

573 between genes and between gene and feature node of gene-AS and gene-pathway. ASpediaFI  
574 refers to a reference network to connect gene interactions. Gene-gene interaction edges were  
575 weighted with the absolute value of the Pearson correlation coefficient calculated from gene  
576 expression. Gene-AS interaction edges are connected if the absolute value of the Spearman  
577 correlation coefficient between gene expression and PSI exceeds a user-defined threshold.  
578 Due to the nonlinear relationship between gene expression and PSI values, we used the  
579 Spearman correlation coefficient as a measure of association strength for gene-AS [45].  
580 Finally, gene-pathway edges are weighted to 1 if the corresponding gene belongs to the  
581 corresponding pathway gene set.

### 582 **Query-specific subnetwork identification using DRaWR**

583 To explore the important submodules, we employed DRaWR, which is the extension of  
584 random walk with restart (RWR) using a heterogeneous network consisting of feature nodes  
585 [20]. The DRaWR algorithm performs two-stage RWR in which a functional subnetwork is  
586 extracted in the first stage, and nodes in the subnetwork are ranked by associations with a  
587 query gene set in the second stage (Figure 1B).

588 Let  $A$  be an adjacency matrix representing our heterogeneous network. The adjacency matrix  
589 can be expressed as:

$$M = \begin{bmatrix} M_{gg} & M_{ga} & M_{gp} \\ M_{ag} & M_{aa} & M_{ap} \\ M_{pg} & M_{pa} & M_{pp} \end{bmatrix} \quad (1)$$

590 where submatrices  $M_{gg}$ ,  $M_{ga}$ , and  $M_{gp}$  exhibit edges between gene-gene, gene-AS, and gene-  
591 pathway. Therefore, the entries of  $M$  can be written as:

$$m_{g_i g_j} = \begin{cases} |r_P(g_i, g_j)|, & \text{if found in the gene interaction network} \\ 0, & \text{otherwise} \end{cases} \quad (2)$$

$$m_{g_i a_i} = \begin{cases} |r_S(g_i, a_i)|, & |r_S(g_i, a_i)| > \tau \\ 0, & \text{otherwise} \end{cases} \quad (3)$$

$$m_{g_i p_i} = \begin{cases} 1, & \text{if a gene is in a pathway gene set} \\ 0, & \text{otherwise} \end{cases} \quad (4)$$

592 where  $r_P$  and  $r_S$  are the Pearson and Spearman correlation coefficients, respectively and  $\tau$  is a  
 593 user-defined threshold. Note that  $m_{a_i a_j}$ ,  $m_{a_i p_i}$ , and  $m_{p_i p_j}$  are all zero as there are no edges  
 594 among feature nodes. Before running RWR, each nonzero submatrix is normalized such that  
 595 its entries total 1, and the whole normalized adjacency matrix is again normalized by column  
 596 to obtain a transition matrix  $T$ .

597 Given a transition matrix, the RWR algorithm can be formulated as:

$$\boldsymbol{\pi}^{t+1} = (1 - c)T\boldsymbol{\pi}^t + c\boldsymbol{v} \quad (5)$$

598 where  $\pi_i^t$  is the probability that the walker will stay at node  $i$  after the  $t$ th iteration,  $c$  is the  
 599 probability of restart, and  $v_j$  is the probability of restarting at a node  $j$ . That is, for a query  
 600 gene set  $Q$ ,  $v_j$  is  $\frac{1}{|Q|}$  if  $j \in Q$  and 0 otherwise. We assumed  $\boldsymbol{\pi}^0$  to be a uniform probability  
 601 vector such that  $\pi_i^0 = \frac{1}{n}$ , where  $n$  is the number of all nodes in a heterogeneous network.

602 In the first stage of DRaWR, RWR is run twice, once (Stage 1; S1) with a query gene set and  
 603 another (Stage 2; S2) with all genes in the heterogeneous network as the restart set. The  
 604 difference between the stationary probabilities (stat-P) in the two runs, say  $\widehat{\boldsymbol{\pi}}_Q - \widehat{\boldsymbol{\pi}}_B$ , is a  
 605 measure of relevance to a query gene set and used to rank AS event nodes and pathway nodes  
 606 altogether.

607 Prior to stage 2, ASpediaFI extracts a query-specific subnetwork composed of gene nodes  
608 and the user-defined number of highly ranked AS event and pathway nodes. The adjacency  
609 matrix of the subnetwork can be expressed as:

$$M' = \begin{bmatrix} M_{gg} & M_{ga'} & M_{gp'} \\ M_{a'g} & M_{a'a'} & M_{a'p'} \\ M_{p'g} & M_{p'a'} & M_{p'p'} \end{bmatrix} \quad (6)$$

610 where  $a'$  and  $p'$  denote AS event and pathway nodes retained in the subnetwork. The second-  
611 stage RWR is performed on the subnetwork in the same way as stage 1 to calculate stat-P and  
612 produce final rankings of genes, pathways, and AS events.

### 613 **Evaluation of two-stage DRaWR and permutation test**

614 ASpediaFI carries out a  $k$ -fold cross-validation at each stage of RWR to evaluate the  
615 performance of the DRaWR algorithm, in the same way as mentioned in the previous study  
616 [20]. A query gene set is partitioned into the user-defined number of subsets. For each subset,  
617 RWR is run with the remaining genes as the restart set to compute AUC (area under the curve)  
618 using the subset as true class labels and stat-P's as predictions. In our analysis, we compared  
619 the average AUC at two stages for tuning parameters.

620 While the DRaWR algorithm removes feature nodes having low stat-P values under cutoff  
621 derived from querying a gene set before the second stage, all gene nodes are retained in the  
622 initial network and only provide their final relevance scores. In order to reduce the  
623 background effect of scoring and to filter out false positives, we included the permutation test  
624 on gene nodes in the evaluation procedure [46]. ASpediaFI runs  $N$  iterations of the second-  
625 stage random walks, in each of which a randomly sampled gene set of the same size as a  
626 query gene set is used as the restart set. The permutation  $P$ -value of gene node  $i$  is

$$P_i^{perm} = \frac{1}{N} \sum_{n=1}^N I(\hat{\theta}_i^n > \hat{\pi}_i) \quad (7)$$

627 where  $\hat{\theta}_i^n$  is the second-stage stat-P of node  $i$  when a randomly sampled gene set is given as a  
628 query, and  $I$  is an indicator function which gives 1 if  $\hat{\theta}_i^n > \hat{\pi}_i$  and 0 otherwise. ASpediaFI  
629 refers to stat-Ps as a score for ranking and selecting feature nodes, and permutation  $P$ -values  
630 for choosing pathway-related genes.

631

### 632 **RNA-Seq dataset preparation for case studies**

633 **Case study 1:** The first case study was an RNA-Seq dataset (GEO accession number:  
634 GSE114922) from bone marrow-derived CD34+ hematopoietic progenitor cells of 84  
635 patients with myelodysplastic syndrome (MDS) [13]. Patients exhibited hotspot mutations in  
636 three SF SF3B1 ( $n = 28$ ), SRSF2 ( $n = 6$ ), and U2AF1 ( $n = 8$ ). We first assessed the quality of  
637 reads using FastQC v0.11.5, and aligned to the GRCh38 genome and the reference gene  
638 model GENCODE v31 using STAR v2.6.1b to follow the GDC pipeline with customized  
639 options: `outFilterType = BySJout`, `alignEndsType = EndToEnd`,  
640 `alignSoftClipAtReferenceEnds = No`, `alignIntronMax = 10000`, `alignMatesGapMax = 10000`  
641 [47]. Gene expression profile was evaluated by RSEM v1.3.0 [48]. We calculated the PSI  
642 (percent spliced-in) profile from BAM files based on AS events derived from the input gene  
643 model. To extract the query gene set, differential expression analysis between the mutated  
644 and wild-type samples was performed using limma v3.42.0 [49]. The ASpediaFI analysis was  
645 run with the following options:

- 646 • restart (restart probability): 0.7

- 647 • num.folds (number of folds for cross-validation): 5
- 648 • num.feats (number of features to be retained in a subnetwork): 300
- 649 • low.expr (threshold average FPKM of genes): 1
- 650 • low.var (threshold variance of AS events): NULL
- 651 • prop.na (threshold proportion of missing PSI values): 0.05
- 652 • prop.extreme (threshold proportion of extreme PSI values – 0 or 1): 1
- 653 • cor.threshold (threshold Spearman’s correlation coefficient between genes and AS
- 654 events): 0.4.

655 Based on this, we reconstructed three AS-gene interaction subnetworks regulated by three SF  
656 mutations from the second stage result of DRaWR. Additionally, highly-scored genes  
657 (permutation  $P$ -values  $< 0.05$ ) were selected along with neighboring AS event nodes.

658 We further investigated the characteristics and biological relevance of the identified AS  
659 events. First, we classified the MDS samples into two groups, SF WT and MUT using the  
660 PSI profiles of identified DAS events. We performed hierarchical clustering with complete  
661 linkage on the Euclidean distance matrix of the PSI profiles to evaluate the discriminative  
662 performance, confirmed by principal component analysis (PCA). Next, we used rMATS to  
663 detect DAS between SF3B1 MUT and WT and compared it with our result. Based on  
664 previous MDS study analysis condition, we setup rMATS cutoffs (Cond1:  $|dPSI| > 0.1$  &  
665  $FDR < 0.05$ ) [13]. The number of DAS identified by rMATS Cond1 is over twice of our AS  
666 result. To make similar condition, we additionally performed rMATS of more stringent cutoff  
667 conditions. We first applied the same thresholds (Cond1:  $|dPSI| > 0.1$  &  $FDR < 0.05$ ) to  
668 follow the methodology used in the previous study. The second thresholds (Cond2:  $|dPSI| >$   
669  $0.1$  &  $FDR < 0.0001$ ) were determined so that the number of DAS events was similar to the

670 ASpediaFI result. As our method refers to PPI genes to identify all interactions, only AS  
671 events in genes in our PPI compendium were considered to reduce the bias introduced using  
672 different background genes. We used the Fisher's exact test and Jaccard index to measure  
673 how the results of ASpediaFI, rMATS Cond1, and Cond2 are enriched in the heme  
674 metabolism (HM) pathway, which was highly ranked in the previous study. Additionally, we  
675 defined a novel HM gene set 'HM expansion set' to test whether AS events interact with  
676 genes in the HM pathway and participate in the corresponding biological process. The HM  
677 expansion set included both HM genes and their neighbor genes derived from our gene  
678 interaction network. Fisher's exact test and Jaccard index were also computed for the HM  
679 expansion set. To investigate the functional importance of AS genomic regions, we  
680 interrogated protein domain, NMD, and other sequential features of AS events using the  
681 ASpedia database for ASpediaFI, rMATS, Cond1, and Cond2 [22].

682 **Case study 2:** We chose the TCGA stomach adenocarcinoma (STAD) level 3 RNA-Seq  
683 dataset as another real dataset to investigate AS events and biological processes associated  
684 with ESRP1, a key splicing factor that regulates epithelial-mesenchymal transition (EMT)  
685 across multiple cancer types [2,7,50]. Of the 415 STAD patients, the highest and lowest 10%  
686 mRNA expression samples of ESRP1 were classified as ESRP1-high and ESRP1-low groups,  
687 respectively. Due to the absence of BAM files, we used SUPPA2 v2.3, as was done in the  
688 previous study, and we also used a gene model referred UCSC known genes to generate PSI  
689 profiles [51]. Statistical test for differential expression between the two groups was  
690 performed using limma to obtain a query gene set. We conducted the ASpediaFI analysis  
691 with the following options: restart = 0.7, num.folds = 5, num.feats = 300, low.expr = 1,  
692 low.var = NULL, prop.na = 0.05, prop.extreme = 1 and cor.threshold = 0.5. To compare our  
693 result, we performed DAS analysis using SUPPA2 diffSplice with the following options:

694 nan-threshold = 10, area = 1000 and lower-bound = 0.05 [8]. SUPPA2 DAS set was obtained  
695 by selecting AS events with  $|dPSI| > 0.1$  and adjusted  $P$ -value  $< 0.1$ . Next, we extracted an  
696 EMT-associated subnetwork from the final stage produced by DRaWR. To decrease the  
697 network size, we filtered out gene nodes with permutation  $P$ -values not less than 0.05.

698 Similarly, we tested the discriminative power of our DAS events by classifying STAD  
699 samples based on the Euclidean distance matrix of their PSI profiles using hierarchical  
700 clustering with average linkage. Meanwhile, we test how much our pathway result identified  
701 by ASpediaFI is consistent with GSEA analysis using gene expression profile. Our pathway  
702 result was collected by rankings determined by ASpediaFI. For analysis result using gene  
703 expression, we calculated sample-level pathway activity scores executing gene set variation  
704 analysis (GSVA) [32]. Difference of GSVA scores between high and low groups was tested  
705 by Wilcoxon rank-sum test. Next, we compared ASpediaFI with other DAS test method. The  
706 results from the two applications, ASpediaFI and SUPPA2, were compared using Venn  
707 diagram, Fishers' exact test, and Jaccard index calculated from five EMT or ESRP1-  
708 associated splicing gene signatures [31,33–35]. Like in case study 1, AS event sets for two  
709 conditions were chosen to overlap with global PPI genes. As in the first case study, we  
710 compared the sequential features of AS events detected by ASpediaFI and SUPPA2 by  
711 retrieving from the ASpedia database.

712 **Case study 3:** The last RNA-Seq data (GEO accession number: GSE36710) comprised five  
713 replicates of the shRBFOX1 (RBFOX1 knockdown) and shGFP (control) cell lines [5].  
714 Single-end RNA-Seq reads aligned to the GRCh37 genome and the reference gene model  
715 Ensembl v71 using STAR v2.6.1b with the same options as in case study 1. We calculated  
716 gene expression and PSI values using RSEM and our quantification tool. A query gene set



717 was obtained from the DEG test between RBFOX1 knockdown and control groups using  
718 limma. The following options were selected for the ASpediaFI workflow: restart = 0.7,  
719 num.folds = 5, num.feats = 300, low.expr = 1, low.var = NULL, prop.na = 0.05, prop.extreme  
720 = 1, cor.threshold = 0.8. We then interrogated an RBFOX1-regulated subnetwork. From the  
721 final network produced by the DRaWR algorithm, we retained gene nodes with permutation  
722 *P*-values less than 0.05 and their neighboring AS event nodes.

723 To examine the enrichment of our AS genes in known neuronal genes, we calculated the  
724 Jaccard index between our AS gene set and known gene signatures, as done in the previous  
725 study [5]. We prepared three published gene signatures containing genes inferred from  
726 transcriptomic analysis of RBFOX1 and RBFOX2, and those showing RBFOX1-dependent  
727 splicing in autism spectrum disorder (ASD) brains [52–54]. We also compared with three  
728 control gene signatures – mitochondria, epilepsy, and ataxia [5]. To evaluate the performance  
729 of ASpediaFI for identifying biologically relevant pathways, we performed gene set  
730 enrichment analysis (GSEA) on gene nodes with permutation *P*-values less than 0.05 using  
731 DAVID v6.8 [55]. Our GSEA result was compared with previously identified two gene sets:  
732 blue module and DAS [5]. The blue module comprising 737 genes is a subnetwork identified  
733 by WGCNA using gene expression profiles; DAS contained 603 differentially spliced genes  
734 detected by DESeq [56]. We also explored the sequential features of our AS events retrieved  
735 from the ASpedia database.

736

737 **Performance comparison using SF3B1 mutation MDS patients RNA-Seq dataset**

738 To compare the performance of ASpediaFI against other widely used DAS detection tools,  
739 we extended case study 1 using the SF3B1-associated MDS dataset. In addition to rMATS  
740 v4.0.2, we applied MISO v0.5.4 and SUPPA2 v2.3 to the same MDS RNA-Seq dataset [7–  
741 9,13]. We customized settings for DAS analysis to reflect the characteristics of each tool.  
742 rMATS analysis results were collected from case study 1 and additional cutoffs ( $|\text{dPSI}| > 0.1$   
743 and  $\text{FDR} < 5\%$ ) were applied. For MISO, as only pairwise comparisons are allowed in DAS  
744 analysis, we merged BAM files for multiple samples per condition (SF3B1 MUT: 28 cases  
745 and WT: 56 controls). DAS analysis was performed using the pooled version of BAM files,  
746 and other parameters were used in default settings. We, therefore, filtered the resultant DAS  
747 events with more stringent minimal coverage and Bayes factor (BF) than default values ( $\text{BF} \geq$   
748 20, the sum of inclusion and exclusion reads  $\geq 300$ , at least 30 inclusion and exclusion reads),  
749 and eliminated AS events by the same cutoff ( $|\text{dPSI}| \leq 0.1$ ) with rMATS. For SUPPA2, to  
750 obtain PSI profiles, we quantified transcript expression in TPM units using RSEM v1.3.0.  
751 Next, we executed the embedded modules *psiPerEvent* to generate PSI profiles and *diffSplice*  
752 to detect DAS events using default options. The same thresholds with rMATS were also  
753 applied to select final DAS events derived from SUPPA2. To evaluate the performance of the  
754 four methods, we tested gene set enrichment of HM pathway referring to the top-ranking  
755 results in case study 1 and previously published studies [4,13,23–26]. To test the enrichment  
756 of DAS events for each tool, we converted DAS events to gene symbols and computed  
757 Fisher’s exact test *P*-values and F1 scores for HM and expansion pathway gene sets.

### 758 **Performance benchmark using simulated datasets**

759 To evaluate the ability to detect functionally-enriched DAS of ASpediaFI, we generated a  
760 simulation dataset close to the actual MDS patient RNA-Seq dataset. To define the ground

761 truth AS gene set for simulation, we intended to select AS genes that are highly likely to  
762 occur for the real MDS samples instead of randomly chosen genes. Therefore we investigated  
763 gene sets using three different methods. We applied the same running options for rMATS,  
764 MISO, and SUPPA2 as with previous evaluations using MDS samples. To identify more  
765 DAS genes on intersection set, we imposed relatively less stringent cutoffs:  $|dPSI| > 0.025$ ,  
766  $FDR < 10\%$  for rMATS and SUPPA2. For MISO, additional strict thresholds were applied to  
767 balance the number of DAS events with the other two methods ( $BF \geq 800$ , the sum of  
768 inclusion and exclusion reads  $\geq 700$ ), as well as the same relaxed cutoff ( $|dPSI| > 0.025$ ).  
769 Finally, the resulting set of DAS genes overlapping between the three tools was assigned as  
770 our ground truth for the simulated dataset.

771 Next, we generated 20 replicates per condition (SF3B1 MUT and WT) via Flux Simulator  
772 [57], executing scripts from the previous simulation study [12]. To simulate realistic RNA-  
773 Seq reads, we referred to the real RNA-Seq samples of MDS patients with SF3B1 MUT and  
774 WT. Transcript counts were sampled from a negative binomial distribution with mean and  
775 variance estimated for MUT and WT conditions of the original MDS BAM files. For the  
776 deliberately chosen true DAS genes, we set relative isoform abundances such that the last  
777 isoform took a pre-determined proportion (0.8 for MUT and 0.2 for WT), while others  
778 equally shared the rest. Isoform-level abundances of other genes were drawn from a uniform  
779 distribution. The simulated RNA-Seq reads for each replicate with mean base coverage of 65  
780 were then mapped to the GRCh38 genome along with the GENCODE v31 gene model, using  
781 STAR v2.5.1b. Additionally, to evaluate the effect of sample size, 10 and 5 replicates per  
782 condition were randomly chosen from the full simulated dataset. We performed DAS tests  
783 using the simulation dataset for ASpediaFI and three other methods. ASpediaFI was run with  
784 the following options: `restart = 0.7`, `num.folds = 5`, `num.feats = 500`, `low.expr = 1`, `low.var =`

785 NULL, prop.na = 0.05, prop.extreme = 1. For each simulated datasets of different sizes (n=20,  
786 10, 5 replicates per condition), the cor.threshold option was adjusted by the number of  
787 detected AS event nodes (0.4, 0.5, 0.8, respectively). The three tools were applied using  
788 options previously described. As the genome-wide ranking results were compared, additional  
789 filtering by dPSI was excluded.

790 To evaluate the accuracy of the four methods, we generated receiver operating characteristic  
791 (ROC) curve and computed the area under the curve (AUC-ROC) metric, using R PRROC  
792 package [58]. We also calculated the area under the precision-recall curve (AUC-PR) metric.  
793 Ranking of AS events were computed based on measures of 1 – adjusted *P* values for rMATS  
794 and SUPPA2, BF for MISO, and stat-P for ASpediaFI S1 and S2 were provided. Moreover,  
795 to assess the effect of sample size, we computed AUC-ROC and AUC-PR metrics using the  
796 simulated datasets of randomly-chosen smaller sample sizes (n = 10, 5 replicates per  
797 condition).

798 For further performance evaluation, we investigated pathway enrichment, and evaluated  
799 whether the four methods maintained their ability to identify biologically-relevant AS events  
800 using the simulated dataset. Based on previous studies and case study 1, we assumed that the  
801 HM pathway is dysregulated in MDS patients with SF3B1 mutation [4,13,23–26]. As our  
802 simulation dataset was derived from the actual MDS patient sample analysis result, we  
803 investigated the pathway status similar to the previously described process. To confirm  
804 GSEA consistency between DAS and DEG, we applied GAGE to perform GSEA using gene  
805 expression profiles for hallmark pathways [59]. Next, for the DAS enrichment test, we  
806 extracted an equal number (top 500) of most significant DAS events for each tool after  
807 filtering out by  $|dPSI| \leq 0.1$ . Finally, we assessed the enrichment of AS event sets for the four

808 methods by conducting Fisher's exact test and computing the  $F_I$  score from HM and  
809 expansion sets.

## 810 **Abbreviations**

811 AS: Alternative splicing

812 DRaWR: Discriminative random walk with restart

813 DAS: Differential alternative splicing

814 DEG: Differentially expressed genes

815 EMT: Epithelial-to-mesenchymal

816 GSEA: Gene set enrichment analysis

817 PSI: Percent spliced in

818 SF: Splicing factor

819 Stat-P: Stationary probability

820

## 821 **Declarations**

### 822 **Ethics approval and consent to participate**

823 Ethics approval was not applicable for this study.

### 824 **Competing interests**

825 The authors declare that they have no competing interests.

826 **Availability of data and materials**

827 Datasets used in this manuscript are accessible at GEO (accession: GSE114922 and  
828 GSE36710) and GDC (TCGA STAD RNA-Seq level3). ASpediaFI is supported as an R  
829 package open source program. The tool, user manual and case study are publicly available at  
830 Bioconductor (<https://bioconductor.org/packages/ASpediaFI>).

831 **Authors' contribution**

832 Conceptualization, supervision and funding acquisition, C.P.; algorithm implementation and  
833 analysis, D.Y., K.L., and D.H.; evaluation, D.Y. and K.L; writing, review, and editing, D.Y.,  
834 K.L. S.Y.C., and C.P.

835 **Funding**

836 This work was supported by National Research Foundation of Korea grant funded by the  
837 Korea government (NRF-2019R1A2C1003401); National Cancer Center Grant (NCC-  
838 1910040).

839

840 **REFERENCES**

- 841 1. Yang X, Coulombe-Huntington J, Kang S, Sheynkman GM, Hao T, Richardson A, et al.  
842 Widespread Expansion of Protein Interaction Capabilities by Alternative Splicing. *Cell*.  
843 2016;164:805–17.
- 844 2. Saha A, Kim Y, Gewirtz ADH, Jo B, Gao C, McDowell IC, et al. Co-expression networks  
845 reveal the tissue-specific regulation of transcription and splicing. *Genome Res*.  
846 2017;27:1843–58.
- 847 3. Salomonis N, Schlieve CR, Pereira L, Wahlquist C, Colas A, Zambon AC, et al.  
848 Alternative splicing regulates mouse embryonic stem cell pluripotency and differentiation.  
849 *Proc Natl Acad Sci U S A*. 2010;107:10514–9.
- 850 4. Dolatshad H, Pellagatti A, Liberante FG, Llorian M, Repapi E, Steeples V, et al. Cryptic  
851 splicing events in the iron transporter ABCB7 and other key target genes in SF3B1-mutant  
852 myelodysplastic syndromes. *Leukemia*. 2016;30:2322–31.
- 853 5. Fogel BL, Wexler E, Wahnich A, Friedrich T, Vijayendran C, Gao F, et al. RBFOX1  
854 regulates both splicing and transcriptional networks in human neuronal development. *Hum*  
855 *Mol Genet*. 2012;21:4171–86.
- 856 6. Seiler M, Peng S, Agrawal AA, Palacino J, Teng T, Zhu P, et al. Somatic Mutational  
857 Landscape of Splicing Factor Genes and Their Functional Consequences across 33 Cancer  
858 Types. *Cell Rep*. 2018;23:282-296.e4.
- 859 7. Shen S, Park JW, Lu Z, Lin L, Henry MD, Wu YN, et al. rMATS: Robust and flexible  
860 detection of differential alternative splicing from replicate RNA-Seq data. *Proc Natl Acad Sci*.  
861 2014;111:E5593–601.

- 862 8. Trincado JL, Entizne JC, Hysenaj G, Singh B, Skalic M, Elliott DJ, et al. SUPPA2: fast,  
863 accurate, and uncertainty-aware differential splicing analysis across multiple conditions.  
864 *Genome Biol.* 2018;19:40.
- 865 9. Katz Y, Wang ET, Airoidi EM, Burge CB. Analysis and design of RNA sequencing  
866 experiments for identifying isoform regulation. *Nat Methods.* 2010;7:1009–15.
- 867 10. Wang Q, Rio DC. JUM is a computational method for comprehensive annotation-free  
868 analysis of alternative pre-mRNA splicing patterns. *Proc Natl Acad Sci.* 2018;115:E8181–90.
- 869 11. Saraiva-Agostinho N, Barbosa-Morais NL. psichomics: graphical application for  
870 alternative splicing quantification and analysis. *Nucleic Acids Res.* 2019;47:e7–e7.
- 871 12. Liu R, Loraine AE, Dickerson JA. Comparisons of computational methods for differential  
872 alternative splicing detection using RNA-seq in plant systems. *BMC Bioinformatics.*  
873 2014;15:364.
- 874 13. Pellagatti A, Armstrong RN, Steeples V, Sharma E, Repapi E, Singh S, et al. Impact of  
875 spliceosome mutations on RNA splicing in myelodysplasia: dysregulated genes/pathways and  
876 clinical associations. *Blood.* 2018;132:1225–40.
- 877 14. Irimia M, Weatheritt RJ, Ellis JD, Parikshak NN, Gonatopoulos-Pournatzis T, Babor M,  
878 et al. A highly conserved program of neuronal microexons is misregulated in autistic brains.  
879 *Cell.* 2014;159:1511–23.
- 880 15. Lee SCW, Abdel-Wahab O. Therapeutic targeting of splicing in cancer. *Nat. Med.* 2016.  
881 p. 976–86.



- 882 16. Warzecha CC, Sato TK, Nabet B, Hogenesch JB, Carstens RP. ESRP1 and ESRP2 Are  
883 Epithelial Cell-Type-Specific Regulators of FGFR2 Splicing. *Mol Cell*. 2009;33:591–601.
- 884 17. Wang B-D, Ceniccola K, Hwang S, Andrawis R, Horvath A, Freedman JA, et al.  
885 Alternative splicing promotes tumour aggressiveness and drug resistance in African  
886 American prostate cancer. *Nat Commun*. 2017;8:15921.
- 887 18. Liberzon A, Birger C, Thorvaldsdóttir H, Ghandi M, Mesirov JP, Tamayo P. The  
888 Molecular Signatures Database Hallmark Gene Set Collection. *Cell Syst*. 2015;1:417–25.
- 889 19. Croft D, O’Kelly G, Wu G, Haw R, Gillespie M, Matthews L, et al. Reactome: a database  
890 of reactions, pathways and biological processes. *Nucleic Acids Res*. 2011;39:D691-7.
- 891 20. Blatti C, Sinha S. Characterizing gene sets using discriminative random walks with restart  
892 on heterogeneous biological networks. *Bioinformatics*. 2016;32:2167–75.
- 893 21. Valdeolivas A, Tichit L, Navarro C, Perrin S, Odelin G, Levy N, et al. Random walk with  
894 restart on multiplex and heterogeneous biological networks. *Bioinformatics*. 2019;35:497–  
895 505.
- 896 22. Hyung D, Kim J, Cho SY, Park C. ASpedia: a comprehensive encyclopedia of human  
897 alternative splicing. *Nucleic Acids Res*. 2018;46:58–63.
- 898 23. Pellagatti A, Cazzola M, Giagounidis AAN, Malcovati L, Della Porta MG, Killick S, et al.  
899 Gene expression profiles of CD34+ cells in myelodysplastic syndromes: Involvement of  
900 interferon-stimulated genes and correlation to FAB subtype and karyotype. *Blood*.  
901 2006;108:337–45.

- 902 24. Dolatshad H, Pellagatti A, Fernandez-Mercado M, Yip BH, Malcovati L, Attwood M, et  
903 al. Disruption of SF3B1 results in deregulated expression and splicing of key genes and  
904 pathways in myelodysplastic syndrome hematopoietic stem and progenitor cells. *Leukemia*.  
905 2015;29:1092–103.
- 906 25. Conte S, Katayama S, Vesterlund L, Karimi M, Dimitriou M, Jansson M, et al. Aberrant  
907 splicing of genes involved in haemoglobin synthesis and impaired terminal erythroid  
908 maturation in SF3B1 mutated refractory anaemia with ring sideroblasts. *Br J Haematol*.  
909 2015;171:478–90.
- 910 26. Shiozawa Y, Malcovati L, Gallì A, Sato-Otsubo A, Kataoka K, Sato Y, et al. Aberrant  
911 splicing and defective mRNA production induced by somatic spliceosome mutations in  
912 myelodysplasia. *Nat Commun*. 2018;9:3649.
- 913 27. de Oliveira RM, Vicente Miranda H, Francelle L, Pinho R, Szegő ÉM, Martinho R, et al.  
914 The mechanism of sirtuin 2–mediated exacerbation of alpha-synuclein toxicity in models of  
915 Parkinson disease. *PLoS Biol*. 2017;15.
- 916 28. Nakamura K, Kageyama S, Yue S, Huang J, Fujii T, Ke B, et al. Heme oxygenase-1  
917 regulates sirtuin-1–autophagy pathway in liver transplantation: From mouse to human. *Am J*  
918 *Transplant*. 2018;18:1110–21.
- 919 29. Shao J, Grammatikakis N, Scroggins BT, Uma S, Huang W, Chen JJ, et al. Hsp90  
920 regulates p50cdc37 function during the biogenesis of the active conformation of the heme-  
921 regulated eIF2 $\alpha$  kinase. *J Biol Chem*. 2001;276:206–14.

- 922 30. Warzecha CC, Shen S, Xing Y, Carstens RP, Warzecha CC, Shen S, et al. The epithelial  
923 splicing factors ESRP1 and ESRP2 positively and negatively regulate diverse types of  
924 alternative splicing events Claude. *RNA Biol.* 2009;6:546–62.
- 925 31. Shapiro IM, Cheng AW, Flytzanis NC, Balsamo M, Condeelis JS, Oktay MH, et al. An  
926 emt-driven alternative splicing program occurs in human breast cancer and modulates cellular  
927 phenotype. *PLoS Genet.* 2011;7:e1002218.
- 928 32. Hänzelmann S, Castelo R, Guinney J. Open Access GSEA: gene set variation analysis  
929 for microarray and RNA-Seq data. *BMC Bioinformatics.* 2013;14.
- 930 33. Yang Y, Park JW, Bebee TW, Warzecha CC, Guo Y, Shang X, et al. Determination of a  
931 Comprehensive Alternative Splicing Regulatory Network and Combinatorial Regulation by  
932 Key Factors during the Epithelial-to-Mesenchymal Transition. *Mol Cell Biol.* 2016;36:1704–  
933 19.
- 934 34. Warzecha CC, Jiang P, Amirikian K, Dittmar KA, Lu H, Shen S, et al. An ESRP-  
935 regulated splicing programme is abrogated during the epithelial–mesenchymal transition.  
936 *EMBO J.* 2010;29:3286–300.
- 937 35. Dittmar KA, Jiang P, Park JW, Amirikian K, Wan J, Shen S, et al. Genome-wide  
938 determination of a broad ESRP-regulated posttranscriptional network by high-throughput  
939 sequencing. *Mol Cell Biol.* 2012;32:1468–82.
- 940 36. Wiczorek K, Wiktorska M, Sacewicz-Hofman I, Boncela J, Lewiński A, Kowalska MA,  
941 et al. Filamin A upregulation correlates with Snail-induced epithelial to mesenchymal  
942 transition (EMT) and cell adhesion but its inhibition increases the migration of colon  
943 adenocarcinoma HT29 cells. *Exp Cell Res.* 2017;359:163–70.

- 944 37. Di Modugno F, Iapicca P, Boudreau A, Mottolese M, Terrenato I, Perracchio L, et al.  
945 Splicing program of human MENA produces a previously undescribed isoform associated  
946 with invasive, mesenchymal-like breast tumors. *Proc Natl Acad Sci U S A*. 2012;109:19280–  
947 5.
- 948 38. Weise A, Bruser K, Elfert S, Wallmen B, Wittel Y, Wöhrle S, et al. Alternative splicing  
949 of Tcf7l2 transcripts generates protein variants with differential promoter-binding and  
950 transcriptional activation properties at Wnt/beta-catenin targets. *Nucleic Acids Res*.  
951 2010;38:1964–81.
- 952 39. Cristescu R, Lee J, Nebozhyn M, Kim KM, Ting JC, Wong SS, et al. Molecular analysis  
953 of gastric cancer identifies subtypes associated with distinct clinical outcomes. *Nat Med*.  
954 2015;21:449–56.
- 955 40. Papaemmanuil E, Cazzola M, Boultwood J, Malcovati L, Vyas P, Bowen D, et al.  
956 Somatic SF3B1 mutation in myelodysplasia with ring sideroblasts. *N Engl J Med*.  
957 2011;365:1384–95.
- 958 41. Bader GD, Betel D, Hogue CW V. BIND: the Biomolecular Interaction Network  
959 Database. *Nucleic Acids Res*. 2003;31:248–50.
- 960 42. Xenarios I, Rice DW, Salwinski L, Baron MK, Marcotte EM, Eisenberg D. DIP: the  
961 database of interacting proteins. *Nucleic Acids Res*. 2000;28:289–91.
- 962 43. Keshava Prasad TS, Goel R, Kandasamy K, Keerthikumar S, Kumar S, Mathivanan S, et  
963 al. Human Protein Reference Database--2009 update. *Nucleic Acids Res*. 2009;37:D767–72.
- 964 44. Kanehisa M, Sato Y, Kawashima M, Furumichi M, Tanabe M. KEGG as a reference  
965 resource for gene and protein annotation. *Nucleic Acids Res*. 2016;44:D457–62.

- 966 45. de Winter JCF, Gosling SD, Potter J. Comparing the pearson and spearman correlation  
967 coefficients across distributions and sample sizes: A tutorial using simulations and empirical  
968 data. *Psychol Methods*. 2016;21:273–90.
- 969 46. Zhu L, Su F, Xu YC, Zou Q. BBA - Molecular Basis of Disease Network-based method  
970 for mining novel HPV infection related genes using random walk with restart algorithm.  
971 *BBA - Mol Basis Dis*. 2018;1864:2376–83.
- 972 47. Dobin A, Davis CA, Schlesinger F, Drenkow J, Zaleski C, Jha S, et al. STAR: ultrafast  
973 universal RNA-seq aligner. *Bioinformatics*. 2013;29:15–21.
- 974 48. Li B, Dewey CN. RSEM: accurate transcript quantification from RNA-Seq data with or  
975 without a reference genome. *BMC Bioinformatics*. 2011;12:323.
- 976 49. Ritchie ME, Phipson B, Wu D, Hu Y, Law CW, Shi W, et al. limma powers differential  
977 expression analyses for RNA-sequencing and microarray studies. 2015;43.
- 978 50. Network TCGAR. Comprehensive molecular characterization of gastric adenocarcinoma.  
979 *Nature*. 2014;513:202–9.
- 980 51. Sebestyén E, Singh B, Miñana B, Pagès A, Mateo F, Pujana MA, et al. Large-scale  
981 analysis of genome and transcriptome alterations in multiple tumors unveils novel cancer-  
982 relevant splicing networks. *Genome Res*. 2016;26:732–44.
- 983 52. Zhang C, Zhang Z, Castle J, Sun S, Johnson J, Krainer AR, et al. Defining the regulatory  
984 network of the tissue-specific splicing factors Fox-1 and Fox-2. *Genes Dev*. 2008;22:2550–  
985 63.

- 986 53. Yeo GW, Coufal NG, Liang TY, Peng GE, Fu XD, Gage FH. An RNA code for the  
987 FOX2 splicing regulator revealed by mapping RNA-protein interactions in stem cells. *Nat.*  
988 *Struct. Mol. Biol.* 2009. p. 130–7.
- 989 54. Voineagu I, Wang X, Johnston P, Lowe JK, Tian Y, Horvath S, et al. Transcriptomic  
990 analysis of autistic brain reveals convergent molecular pathology. *Nature.* 2011;474:380–6.
- 991 55. Huang DW, Sherman BT, Lempicki RA. Systematic and integrative analysis of large  
992 gene lists using DAVID bioinformatics resources. *Nat Protoc.* 2009;4:44–57.
- 993 56. Anders S, Huber W. Differential expression analysis for sequence count data. *Genome*  
994 *Biol.* 2010;11.
- 995 57. Griebel T, Zacher B, Ribeca P, Raineri E, Lacroix V, Guigó R, et al. Modelling and  
996 simulating generic RNA-Seq experiments with the flux simulator. *Nucleic Acids Res.*  
997 2012;40:10073–83.
- 998 58. Grau J, Grosse I, Keilwagen J. PRROC: computing and visualizing precision-recall and  
999 receiver operating characteristic curves in R. *Bioinformatics.* 2015;31:2595–7.
- 1000 59. Luo W, Friedman MS, Shedden K, Hankenson KD, Woolf PJ. GAGE: Generally  
1001 applicable gene set enrichment for pathway analysis. *BMC Bioinformatics.* 2009;10:161.
- 1002
- 1003

1004 **TABLES AND FIGURES**

1005 **Figure 1.** ASpediaFI workflow and DRaWR algorithm to identify AS interaction subnetwork.

1006 A) ASpediaFI establishes a heterogeneous network using gene interaction, gene-AS  
1007 correlation, and gene-pathway association data. AS events are annotated from a GTF file, and  
1008 PSI calculation using BAM files is also embedded. Public gene sets are referred for gene-  
1009 pathway associations. B) A heterogeneous network is composed of genes and its feature  
1010 nodes, AS events and pathways. Gene-gene and gene-AS interaction edges are weighted by  
1011 correlations of gene expression and PSI values. Next, all edge weights are normalized for  
1012 each type of feature interaction and each column. The first stage RWR explores a  
1013 heterogeneous network starting from nodes in a query gene set (blue nodes). The second  
1014 stage RWR finalizes scores within a query-specific subnetwork derived from the first stage.  
1015 ASpediaFI additionally computes permutation  $P$ -values of the gene nodes to eliminate the  
1016 effect of the background gene set.

1017 **Figure 2.** MDS patient RNA-Seq dataset analysis to identify AS events and pathways  
1018 regulated by SF3B1, SRSF2, and U2AF1 mutations. A) Percentages of five AS types  
1019 identified by ASpediaFI for three SF MUT cases. B) Heatmap of the top 15 pathways ranked  
1020 by stat-Ps. C) PCA plot derived from PSI profiles of SF3B1 MUT-associated 281 events.  
1021 PC1 (x-axis) and PC2 (y-axis) indicate principal component 1 and 2. D) Two barplots of AS  
1022 event enrichment comparison in HM pathway gene set for three conditions: ASpediaFI,  
1023 rMATS Cond1, and Cond2. One is negative log-scale  $P$ -values of Fisher's exact method and  
1024 other's Jaccard indices. E) A Venn diagram of genes related to SF3B1-associated AS events  
1025 identified by ASpediaFI and rMATS (Cond2) compared with the HM expansion set  
1026 containing both HM pathway gene set and interacting novel gene set. For testing enrichment  
1027 with HM expansion,  $P$ -values for ASpediaFI and rMATS were calculated by Fisher's exact

1028 test. In two exclusive intersections of ASpediaFI (n=22) and rMATS (n=8), ASpediaFI  
1029 detected more events (n=10) in the expansion set than rMATS (n=5) as well as total events in  
1030 two exclusive intersections. F) Percentage barplots of AS events to contain four functional  
1031 sequence features, protein domain, NMD, PTM, and PPI. It was also compared with rMATS  
1032 Cond1 and Cond2.

1033 **Figure 3.** AS events associated with the EMT pathway regulated by splicing factor ESRP1. A)  
1034 PCA scatter plot using PSI profiles using 293 AS events. B) Percentage pie chart of five AS  
1035 types. C) Pathway identification comparison between our method and gene expression-based  
1036 analysis. Seven pathways in heatmap row were chosen from ASpediaFI pathway ranking, and  
1037 columns were ordered by high and low groups. The heatmap demonstrates pathway-level  
1038 GSVA scores estimated using gene expression profiles. The barplot on the right layout  
1039 presents both our stat-P values (gray) for pathway ranking and log-scaled adjusted *P*-values  
1040 (white) of GSVA scores comparing between ESRP1 high and low groups. D) Venn diagram  
1041 of ASpediaFI, SUPPA2, and the EMT expansion gene set. *P*-values for two AS sets denote  
1042 enrichment with EMT expansion set. E) Status barplots to investigate AS event consistency  
1043 identified by ASpediaFI and SUPPA2. Five EMT splicing gene signatures (Yang ESRP1 [33],  
1044 Yang EMT [33], Warzecha [34], Dittmar [35], and Shapiro [31]) were collected, and Fisher's  
1045 exact test *P*-values and Jaccard indices were calculated. F) Scatter plots between EMT  
1046 pathway scores (y-axis) by GSVA and square-root-transformed AS event PSI values (x-axis)  
1047 for three AS events, ENAH, FGFR2, and TCG7L2. Correlation coefficients were added to  
1048 each plot. Blue dots indicate low group and red dots indicate high group. G) A gene-AS  
1049 interaction subnetwork identified by ASpediaFI. Circle nodes denote gene nodes, and  
1050 hexagons are AS events. AS event nodes were filled in color by dPSI values. To extract  
1051 smaller size EMT-relevant subnetwork for generating plot, we eliminated gene nodes



1052 belonging to the EMT expansion set with  $\log_2$  fold change  $< 2$  and AS nodes of  $|dPSI| <$   
1053  $0.25$ . Multiple edges of one AS node were trimmed except the one with the maximum score.  
1054 The dotted line ellipse indicates the interactions of three spliced genes (Figure 3F).

1055 **Figure 4.** Analysis of the RBFOX1 knockdown RNA-Seq dataset. A) A pie chart showing  
1056 the proportion of 5 AS event types. B) Jaccard index barplots between our result and splicing  
1057 gene signatures collected from a previous study [5]. Three relevant RBFOX1-associated  
1058 splicing gene sets were overlapped with three controls. C) Dot plot for percentile ranks of GO  
1059 terms (row) from gene sets (column) by three different methods, our genes extracted by  
1060 permutation  $P$ -values (FI), neuronal development genes identified by WGCNA referring gene  
1061 expression (Blue Module), and differentially spliced genes (DAS). The last two gene sets  
1062 were derived from the previous study result. D) RBFOX1-associated subnetwork that  
1063 ASpediaFI identified. To extract a smaller size subnetwork, we eliminated gene nodes  
1064 belonging to neuron differentiation set with  $\log_2$  fold change  $< 0.25$  and AS nodes of  $|dPSI|$   
1065  $(< 0.15)$ . E) Exonic structure of exon 18 skipping (red) and protein domains of ROBO1.

1066 **Figure 5.** Performance evaluation of ASpediaFI and comparison with three other methods  
1067 (MISO, rMATS, and SUPPA2) (A) Barplots of Fishers' exact test  $P$ -values and  $F_1$  scores to  
1068 test pathway enrichment for both HM and expansion sets. Enrichment was tested from two  
1069 pathway gene sets, and AS event gene sets identified from four methods. (B) Venn diagram  
1070 of DAS genes among three methods analyzing case study 1 MDS dataset. The intersecting  
1071 DAS genes ( $n = 125$ ) among all three methods serve as the ground truth for the simulated  
1072 dataset. (C) ROC curves to evaluate the accuracy of four methods detecting DAS from a  
1073 simulated dataset. ROC curves for each method illustrate true-positive rate (y-axis) against  
1074 false-positive rate (x-axis). AUC values are described for each method. The dotted diagonal

1075 line corresponds to a ROC curve when DAS predictions are randomly guessed ( $AUC = 0.5$ ).

1076 (D) Barplots of AUC-ROC and AUC-PR for the evaluation of sample size effect ( $n = 20, 10,$

1077  $5$  replicates per condition). Bar colors indicate the same method as in Figure 5C. (E) GSEA

1078  $P$ -value barplot of highly ranked hallmark pathway from the simulated dataset that we imitate

1079 SF3B1 MUT and WT. HM pathway is detected on top. (F) Barplots of Fishers' exact test  $P$ -

1080 values and  $F_1$  scores to test pathway enrichment for both HM and expansion sets. AS event

1081 sets were extracted from the simulated data analysis using four methods.

**Figure 1**

**A**

### Network Construction

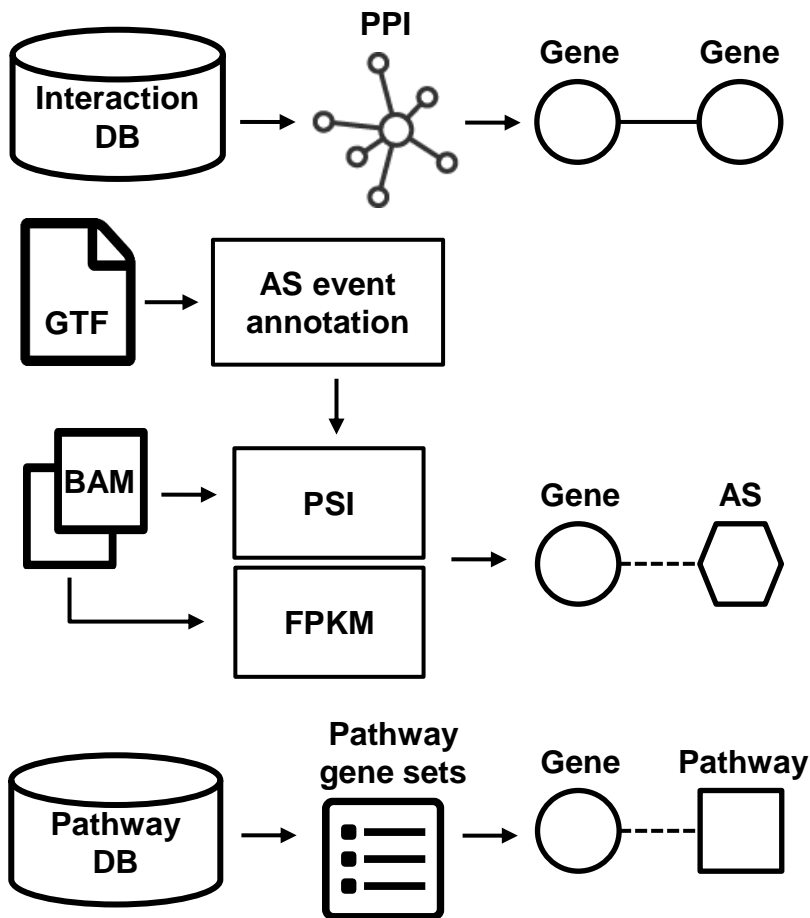

**B**

### DRaWR

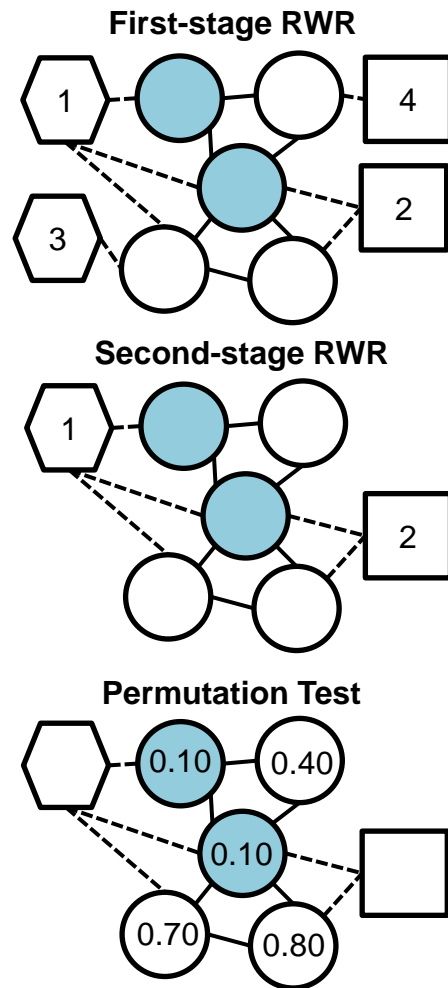

# Figure 2

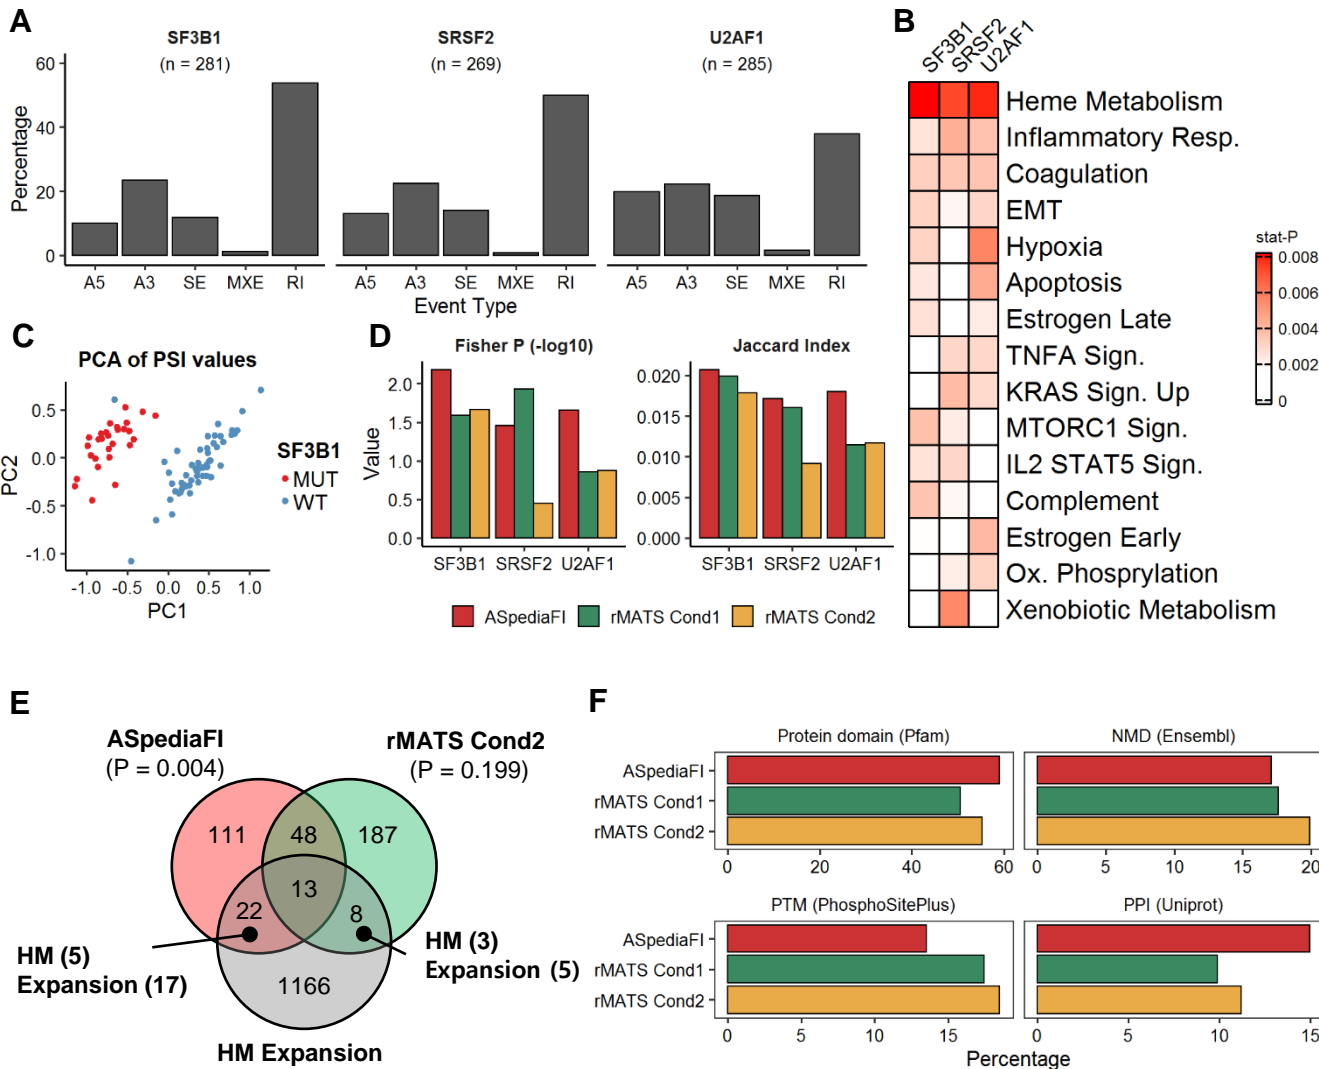

# Figure 3

**A**

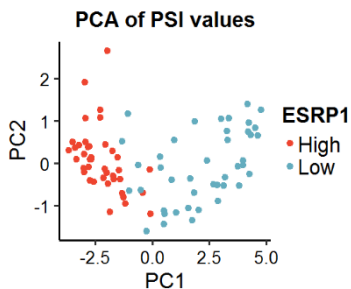

**B**

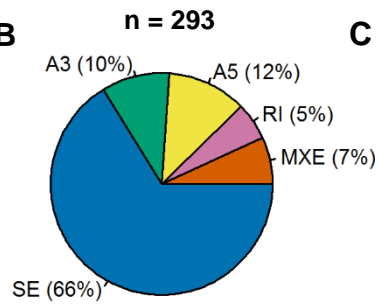

**C**

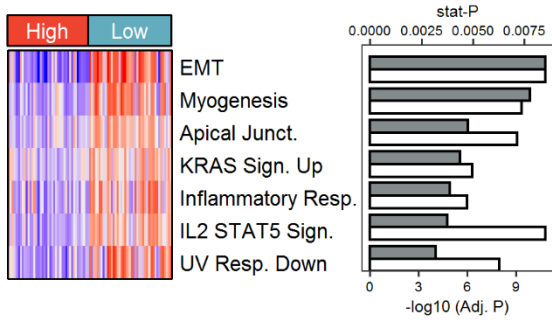

**D**

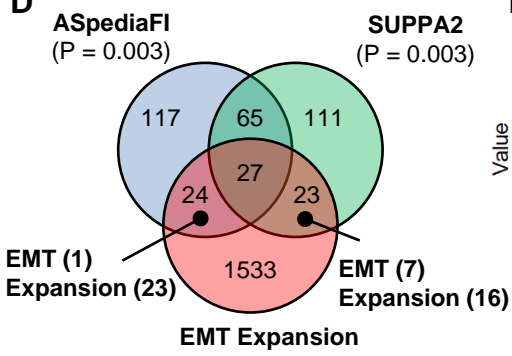

**E**

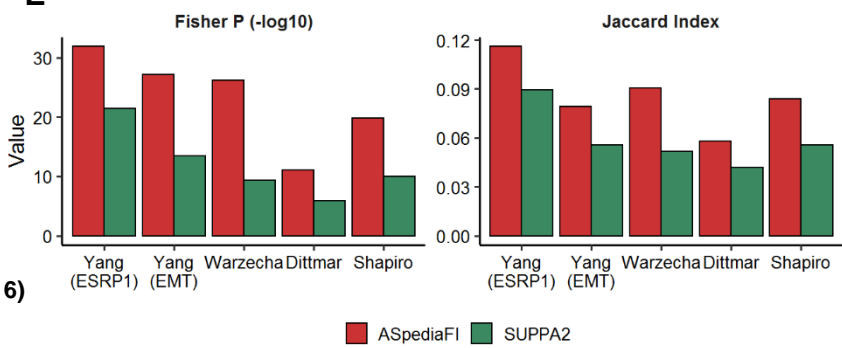

**F**

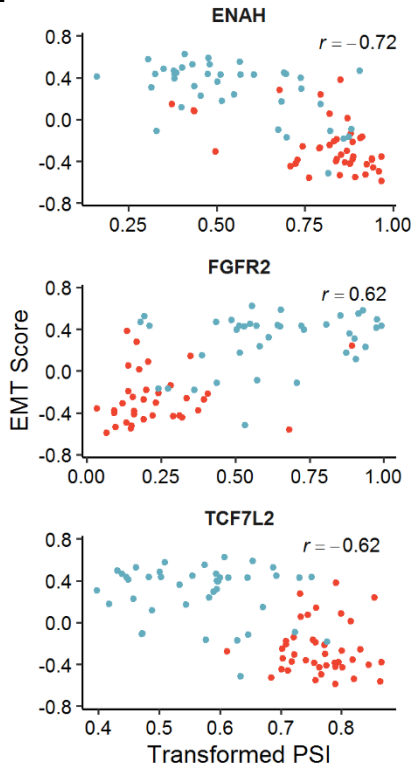

**G**

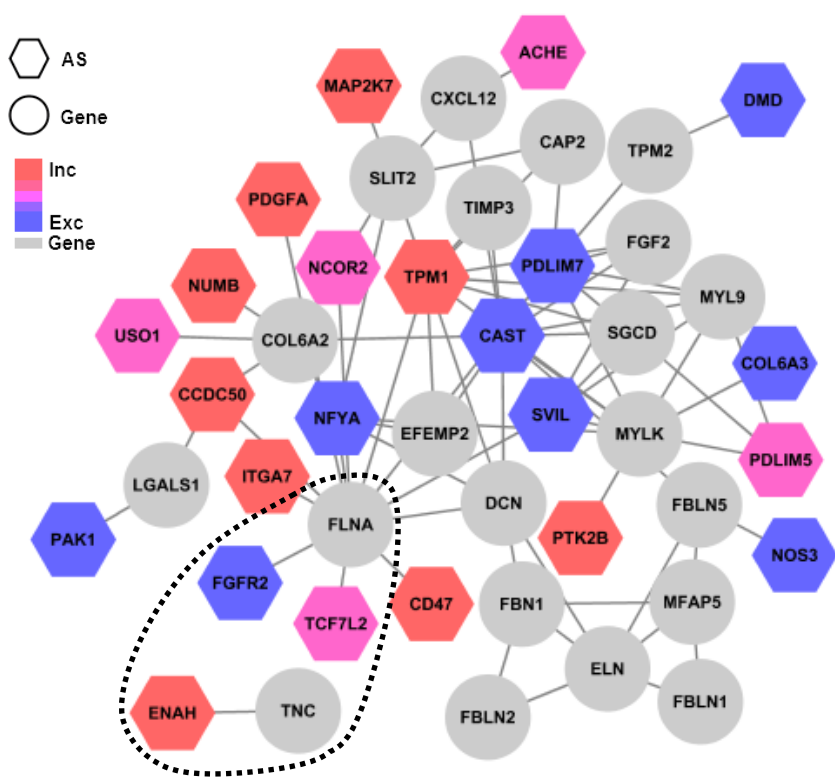

# Figure 4

**A**

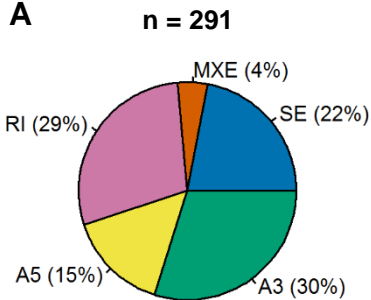

**B**

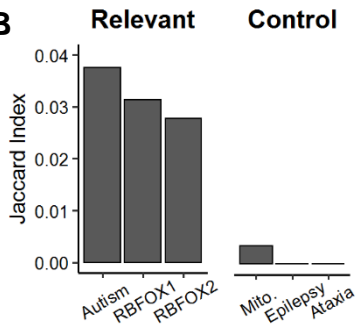

**C**

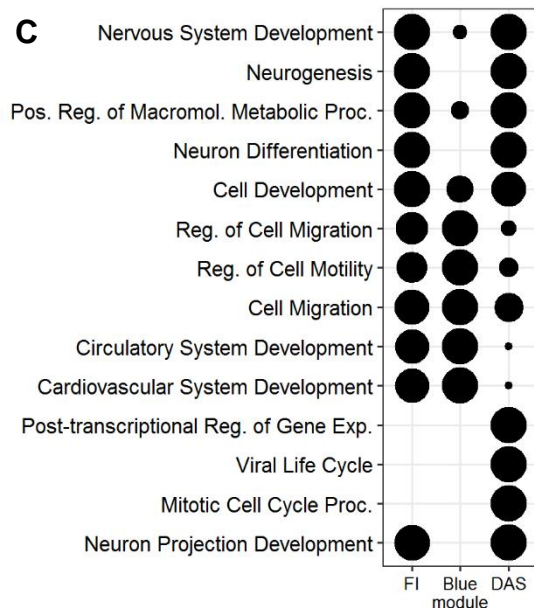

**D**

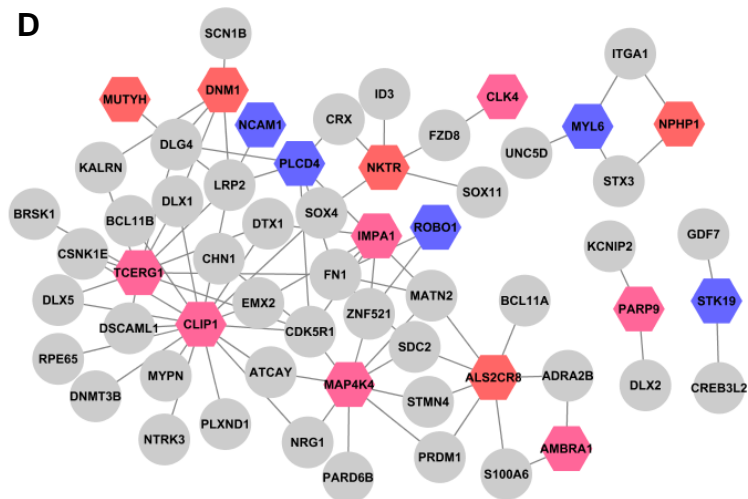

**E**

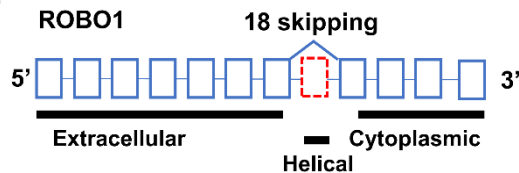

# Figure 5

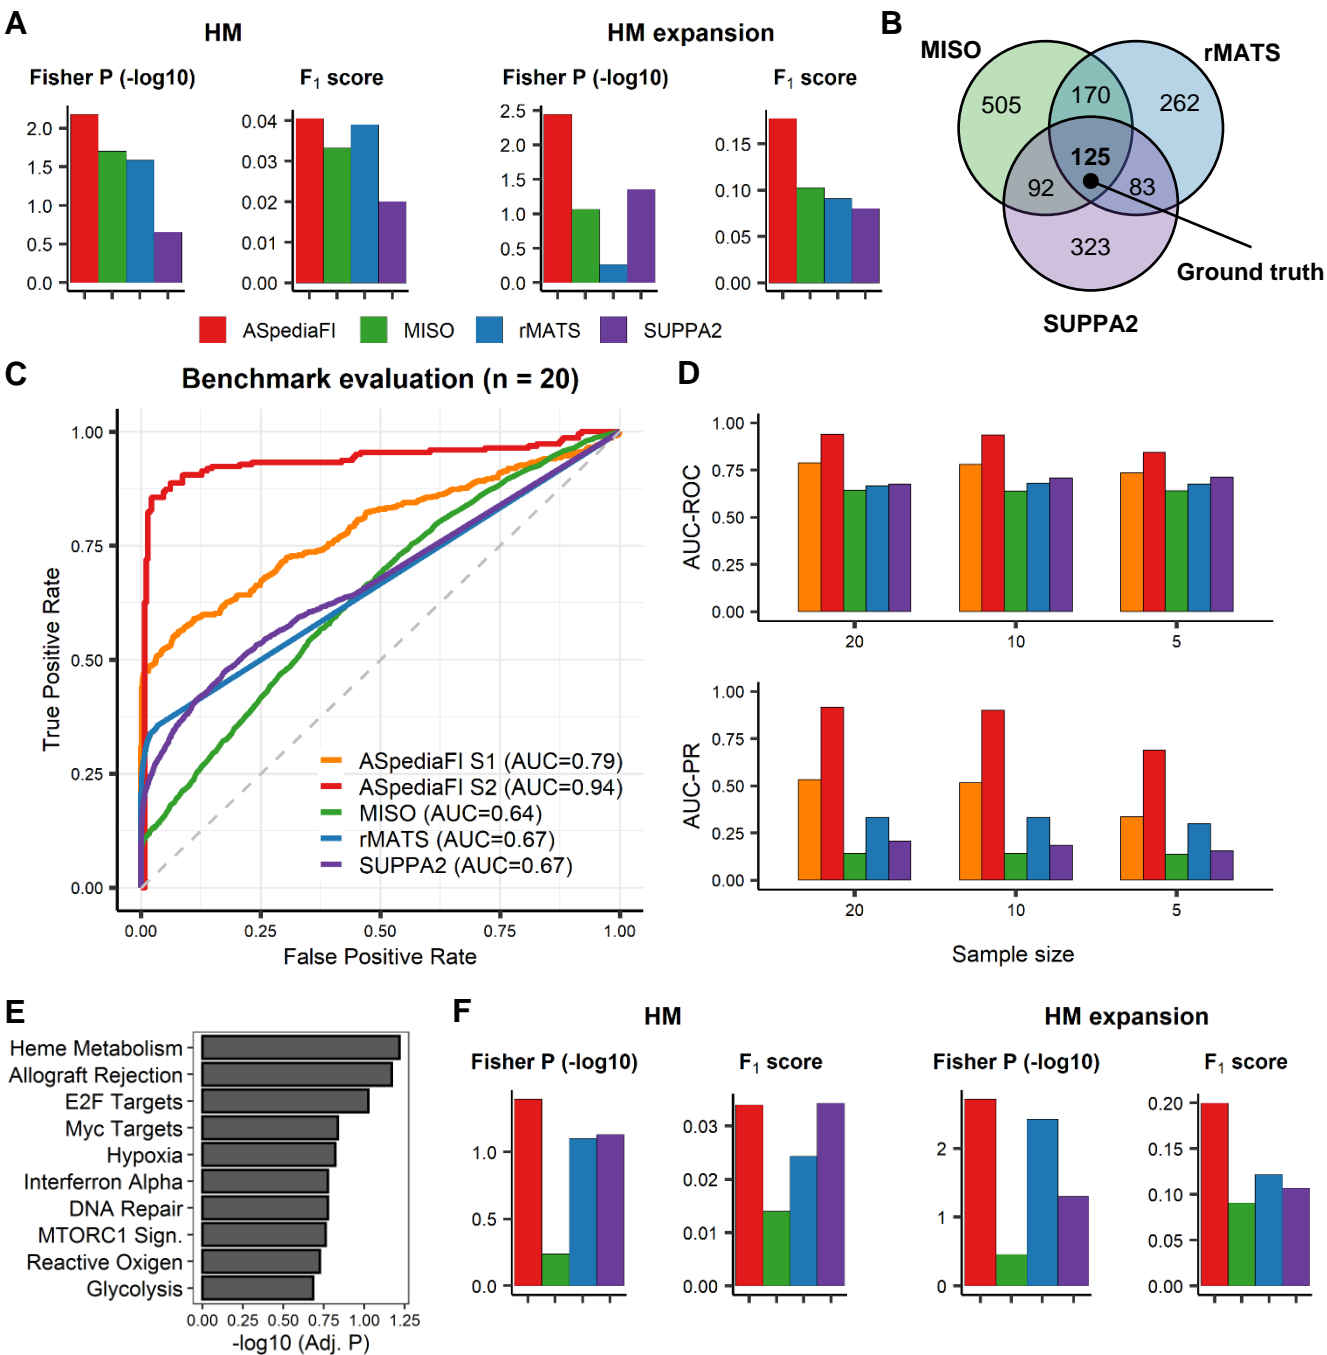

Source: https://www.biorxiv.org/content/biorxiv/early/2020/04/13/2020.04.12.035121.full.pdf
